# Supplementary material
Source: PubMed Central journal article supplement (PMC10431497)
Supplement: ehp10831.s001.acco.pdf [file ehp10831.s001.acco.pdf]

**Note to readers with disabilities:** *EHP* strives to ensure that all journal content is accessible to all readers. However, some figures and Supplemental Material published in *EHP* articles may not conform to [508 standards](#) due to the complexity of the information being presented. If you need assistance accessing journal content, please contact [ehp508@niehs.nih.gov](mailto:ehp508@niehs.nih.gov). Our staff will work with you to assess and meet your accessibility needs within 3 working days.

### **Supplemental Material**

#### **Extreme Temperature Exposure and Risks of Preterm Birth Subtypes Based on a Nationwide Survey in China**

Guoqi Yu, Ling Yang, Ming Liu, Cuiping Wang, Xiaoli Shen, Lichun Fan, and Jun Zhang

#### **Table of Contents**

**Table S1.** The selection basis of the China Labor and Delivery Survey to determine the sample size of deliveries in each hospital according to their levels and types.

**Table S2.** Basic characteristics of climate and air pollution by outcomes in the China Labor and Delivery Survey (N=70,818).

**Table S3.** Basic characteristics of temperature exposure by delivery hospitals and geographic regions in the China Labor and Delivery Survey (N=70,818).

**Table S4.** Extreme climate event exposure by time periods and outcomes in the China Labor and Delivery Survey (N=70,818).

**Table S5.** Associations of extreme climate events with early and late preterm birth in the China Labor and Delivery Survey.

**Table S6.** Associations of extreme climate events with early and late preterm birth in the China Labor and Delivery Survey, stratified by clinical subtypes.

**Table S7.** Associations of extreme climate events with preterm birth in the China Labor and Delivery Survey, stratified by geographic regions.

**Table S8.** Associations of extreme climate events with preterm birth in the China Labor and Delivery Survey, stratified by child sex.

**Table S9.** Estimates from the Cox regression investigating associations of temperature exposure with PTB in the China Labor and Delivery Survey (N=70,818).

**Table S10.** Associations of extreme climate events with preterm birth under different temperature definitions in the China Labor and Delivery Survey.

**Table S11.** Associations of extreme climate events with subtypes of preterm birth during 3 and 4 weeks before delivery in the China Labor and Delivery Survey.

**Table S12.** Associations of extreme temperature with preterm birth risks during cold and warm seasons in the China Labor and Delivery Survey.

**Table S13.** Associations of extreme climate events with preterm birth among subjects without history of preterm birth in the China Labor and Delivery Survey, stratified by early and late preterm birth (N=69,970).

**Table S14.** Associations of extreme climate events with preterm birth among subjects without severe maternal disease in the China Labor and Delivery Survey, stratified by early and late preterm birth (N=69,883).

**Table S15.** Associations of extreme climate events with preterm birth in the China Labor and Delivery Survey, additionally adjusting for background temperature exposure (N=70,818).

**Table S16.** Associations of extreme climate events with preterm birth based on data with multiple imputation in the China Labor and Delivery Survey (N=70,818).

**Figure S1.** The geographical location of study areas in China.

**Figure S2.** Flowchart for population selection.

**Figure S3.** Directed acyclic graph for covariate selection.

**Figure S4.** Relationships between the average temperature exposed during different trimesters and the preterm birth risk in the China Labor and Delivery Survey (N=70,818) (See Tables S9 for corresponding numeric data).

## References

**Table S1. The selection basis of the China Labor and Delivery Survey to determine the sample size of deliveries in each hospital according to their levels and types\*.**

| Province     | Total population (million) | Birth rate (%) | Delivery volume | Secondary hospital |                    |                 | Tertiary hospital |                    |                 | Average delivery volume |                   |
|--------------|----------------------------|----------------|-----------------|--------------------|--------------------|-----------------|-------------------|--------------------|-----------------|-------------------------|-------------------|
|              |                            |                |                 | General hospital   | Maternity hospital | Total hospitals | General hospital  | Maternity hospital | Total hospitals | Secondary hospital      | Tertiary hospital |
| Anhui        | 614.4                      | 12.9           | 792,576         | 101                | 16                 | 117             | 44                | 4                  | 48              | 562,008.4               | 230,567.6         |
| Beijing      | 217.1                      | 7.96           | 172,811.6       | 37                 | 14                 | 51              | 55                | 4                  | 59              | 80,121.7                | 92,689.9          |
| Chongqing    | 301.7                      | 11.05          | 333,378.5       | 79                 | 22                 | 101             | 24                | 2                  | 26              | 265,127.8               | 68,250.7          |
| Fujian       | 383.9                      | 13.9           | 533,621         | 120                | 28                 | 148             | 51                | 4                  | 55              | 389,043.9               | 144,577.1         |
| Gansu        | 260                        | 12.36          | 321,360         | 154                | 22                 | 176             | 35                | 0                  | 35              | 268,053.8               | 53,306.2          |
| Guangdong    | 1,084.9                    | 11.12          | 1206,408.8      | 265                | 58                 | 323             | 120               | 11                 | 131             | 858,304.1               | 348,104.7         |
| Guangxi      | 479.6                      | 14.05          | 673,838         | 146                | 58                 | 204             | 52                | 11                 | 63              | 514,842.5               | 158,995.5         |
| Guizhou      | 353                        | 13             | 458,900         | 114                | 21                 | 135             | 35                | 3                  | 38              | 358,101.2               | 100,798.8         |
| Hainan       | 91.1                       | 14.57          | 132,732.7       | 20                 | 14                 | 34              | 13                | 2                  | 15              | 92,100.2                | 40,632.5          |
| Hebei        | 742.5                      | 11.35          | 842,737.5       | 334                | 96                 | 430             | 57                | 7                  | 64              | 733,556.9               | 109,180.6         |
| Henan        | 948                        | 12.7           | 1203,960        | 314                | 59                 | 373             | 83                | 4                  | 87              | 976,254.5               | 227,705.5         |
| Heilongjiang | 381.2                      | 6              | 228,720         | 132                | 55                 | 187             | 72                | 10                 | 82              | 158,998.7               | 69,721.3          |
| Hubei        | 585.2                      | 10.74          | 628,504.8       | 143                | 64                 | 207             | 97                | 12                 | 109             | 411,710.4               | 216,794.4         |
| Hunan        | 678.3                      | 13.58          | 921,131.4       | 163                | 50                 | 213             | 47                | 12                 | 59              | 721,327.2               | 199,804.2         |
| Jiangsu      | 797.6                      | 9.05           | 721,828         | 54                 | 41                 | 95              | 52                | 17                 | 69              | 418,132.1               | 303,695.9         |
| Liaoning     | 438.2                      | 6.17           | 270,369.4       | 487                | 25                 | 512             | 97                | 7                  | 104             | 224,722.6               | 45,646.8          |
| Neimenggu    | 251.1                      | 7.72           | 193,849.2       | 107                | 6                  | 113             | 33                | 1                  | 34              | 149,013.3               | 44,835.9          |
| Shaanxi      | 379.3                      | 10.1           | 383,093         | 225                | 58                 | 283             | 48                | 9                  | 57              | 318,868.6               | 64,224.4          |
| Shandong     | 984.7                      | 12.55          | 1235,798.5      | 219                | 54                 | 273             | 100               | 15                 | 115             | 869,518                 | 366,280.5         |
| Shanxi       | 366.4                      | 9.98           | 365,667.2       | 147                | 44                 | 191             | 39                | 8                  | 47              | 293,455.6               | 72,211.6          |
| Shanghai     | 241.5                      | 7.52           | 181,608         | 60                 | 18                 | 78              | 35                | 7                  | 42              | 118,045.2               | 63,562.8          |
| Sichuan      | 820.4                      | 10.3           | 845,012         | 243                | 71                 | 314             | 107               | 20                 | 127             | 601,663.9               | 243,348.1         |
| Xinjiang     | 236                        | 15.59          | 367,924         | 137                | 34                 | 171             | 33                | 3                  | 36              | 303,937.2               | 63,986.8          |
| Yunnan       | 474.2                      | 12.88          | 610,769.6       | 164                | 47                 | 211             | 40                | 5                  | 45              | 503,407.8               | 107,361.8         |
| Zhejiang     | 553.9                      | 10.52          | 582,702.8       | 198                | 33                 | 231             | 103               | 21                 | 124             | 379,167.2               | 203,535.6         |
| Jilin        | 275.3                      | 5.87           | 161,601.1       | 110                | 20                 | 130             | 40                | 4                  | 44              | 120,736.5               | 40,864.6          |
| Tianjin      | 154.7                      | 5.84           | 90,344.8        | 37                 | 6                  | 43              | 38                | 2                  | 40              | 46,805.1                | 43,539.7          |
| Jiangxi      | 456.6                      | 13.2           | 60,2712         | 165                | 55                 | 220             | 45                | 9                  | 54              | 483,929.3               | 118,782.7         |
| Xizang       | 32.4                       | 15.75          | 51,030          | 35                 | 6                  | 41              | 9                 | 0                  | 9               | 41,844.6                | 9,185.4           |
| Qinghai      | 58.8                       | 14.72          | 86,553.6        | 43                 | 1                  | 44              | 13                | 2                  | 15              | 64,548.4                | 22,005.2          |
| Ningxia      | 66.8                       | 12.62          | 84,301.6        | 36                 | 14                 | 50              | 9                 | 1                  | 10              | 70,251.3                | 14,050.3          |

\*: These data were extracted from the China Health Statistics Yearbook.

**Table S2. Basic characteristics of climate and air pollution by outcomes in the China Labor and Delivery Survey (N=70,818).**

| Variable                                      | Mean (SD)   | Median (IQR) | P <sub>1</sub> | P <sub>5</sub> | P <sub>10</sub> | Q1   | Q3   | P <sub>90</sub> | P <sub>95</sub> | P <sub>99</sub> |
|-----------------------------------------------|-------------|--------------|----------------|----------------|-----------------|------|------|-----------------|-----------------|-----------------|
| <b>Chronic exposure</b>                       |             |              |                |                |                 |      |      |                 |                 |                 |
| <b>All subjects (N=70,818)</b>                |             |              |                |                |                 |      |      |                 |                 |                 |
| Tem_Total (°C)                                | 15.9 (5.0)  | 16.4 (6.4)   | 2.5            | 6.8            | 9.3             | 13.1 | 19.5 | 21.6            | 23.3            | 25.7            |
| Tem_T1 (°C)                                   | 16.5 (8.5)  | 17.5 (13.4)  | -5.3           | 0.7            | 5.2             | 10.6 | 24   | 26.2            | 27.2            | 28.7            |
| Tem_T2 (°C)                                   | 15.4 (8.9)  | 16.5 (13.3)  | -8.4           | -1.4           | 3.2             | 9.5  | 22.9 | 26.0            | 27.1            | 28.7            |
| Tem_T3 (°C)                                   | 15.9 (9.0)  | 17.2 (14.1)  | -8.7           | -0.7           | 3.3             | 9.6  | 23.7 | 26.6            | 27.4            | 28.5            |
| PM <sub>2.5</sub> _Total (µg/m <sup>3</sup> ) | 53.4 (18.7) | 51.3 (26.0)  | 23.7           | 28.2           | 30.8            | 38.6 | 64.6 | 82.1            | 86.4            | 98.6            |
| PM <sub>2.5</sub> _T1 (µg/m <sup>3</sup> )    | 53.0 (21.6) | 48.4 (30.1)  | 20.9           | 24.5           | 28.2            | 36.2 | 66.3 | 83.7            | 94.3            | 111.3           |
| PM <sub>2.5</sub> _T2 (µg/m <sup>3</sup> )    | 54.7 (26.1) | 48.4 (31.1)  | 18.8           | 23.5           | 27.6            | 36.0 | 67.1 | 92.4            | 110.1           | 136.7           |
| PM <sub>2.5</sub> _T3 (µg/m <sup>3</sup> )    | 52.6 (24.2) | 45.9 (33.3)  | 19.2           | 24             | 27.7            | 34.2 | 67.6 | 84.5            | 102.8           | 128.2           |
| O <sub>3</sub> _Total (µg/m <sup>3</sup> )    | 51.2 (10.5) | 50.0 (13.5)  | 29.0           | 36.0           | 38.4            | 43.9 | 57.3 | 66.0            | 70.8            | 77.6            |
| O <sub>3</sub> _T1 (µg/m <sup>3</sup> )       | 51.2 (18.3) | 50.7 (24.7)  | 13.7           | 22.0           | 27.8            | 38.2 | 62.9 | 75.2            | 83.0            | 94.9            |
| O <sub>3</sub> _T2 (µg/m <sup>3</sup> )       | 50.1 (19.6) | 48.1 (27.3)  | 13.2           | 20.4           | 25.1            | 35.6 | 62.9 | 75.8            | 86.7            | 94.9            |
| O <sub>3</sub> _T3 (µg/m <sup>3</sup> )       | 52.2 (18.9) | 51.5 (26.2)  | 16.5           | 21             | 26.9            | 39.1 | 65.2 | 77.8            | 86.7            | 95.3            |
| <b>PTB=0 (N=65,853)</b>                       |             |              |                |                |                 |      |      |                 |                 |                 |
| Tem_Total (°C)                                | 15.9 (4.9)  | 16.4 (6.4)   | 2.6            | 6.9            | 9.3             | 13.1 | 19.5 | 21.5            | 23.3            | 25.7            |
| Tem_T1 (°C)                                   | 16.5 (8.5)  | 17.5 (13.4)  | -5.2           | 0.5            | 5.1             | 10.6 | 24.0 | 26.3            | 27.2            | 28.8            |
| Tem_T2 (°C)                                   | 15.4 (8.9)  | 16.5 (13.4)  | -8.4           | -1.7           | 3.0             | 9.4  | 22.8 | 26.0            | 27.0            | 28.6            |
| Tem_T3 (°C)                                   | 15.9 (9.0)  | 17.2 (14.1)  | -8.8           | -0.7           | 3.3             | 9.6  | 23.7 | 26.6            | 27.3            | 28.3            |
| PM <sub>2.5</sub> _Total (µg/m <sup>3</sup> ) | 53.5 (18.7) | 51.4 (26.2)  | 23.7           | 28.3           | 30.8            | 38.7 | 64.9 | 82.3            | 86.3            | 98.4            |
| PM <sub>2.5</sub> _T1 (µg/m <sup>3</sup> )    | 53.1 (21.6) | 48.5 (30.2)  | 20.9           | 24.5           | 28.2            | 36.2 | 66.4 | 83.8            | 94.3            | 111.2           |
| PM <sub>2.5</sub> _T2 (µg/m <sup>3</sup> )    | 54.9 (26.2) | 48.6 (31.3)  | 18.8           | 23.4           | 27.8            | 36.1 | 67.4 | 92.8            | 110.6           | 137.0           |
| PM <sub>2.5</sub> _T3 (µg/m <sup>3</sup> )    | 52.7 (24.2) | 46.0 (33.6)  | 19.3           | 24.1           | 27.7            | 34.3 | 67.9 | 84.6            | 102.9           | 128.2           |
| O <sub>3</sub> _Total (µg/m <sup>3</sup> )    | 51.2 (18.3) | 50.7 (24.7)  | 13.7           | 22.1           | 27.8            | 38.2 | 62.9 | 75.3            | 83.0            | 95.6            |
| O <sub>3</sub> _T1 (µg/m <sup>3</sup> )       | 51.2 (10.4) | 50.0 (13.4)  | 29.2           | 36.2           | 38.5            | 44.0 | 57.4 | 66.0            | 70.8            | 77.4            |
| O <sub>3</sub> _T2 (µg/m <sup>3</sup> )       | 50.1 (19.6) | 48.0 (27.2)  | 13.2           | 20.3           | 25.1            | 35.7 | 62.9 | 76.1            | 86.8            | 95.0            |
| O <sub>3</sub> _T3 (µg/m <sup>3</sup> )       | 52.3 (18.8) | 51.5 (26.2)  | 16.7           | 21.1           | 27.2            | 39.1 | 65.4 | 77.9            | 86.9            | 95.3            |
| <b>PTB=1 (N=4,965)</b>                        |             |              |                |                |                 |      |      |                 |                 |                 |
| Tem_Total (°C)                                | 16.3 (5.3)  | 16.9 (6.8)   | 0.7            | 6.3            | 9.4             | 13.2 | 20.0 | 22.5            | 23.7            | 26.4            |
| Tem_T1 (°C)                                   | 16.6 (8.3)  | 18.3 (13.3)  | -6.9           | 2.2            | 5.6             | 10.4 | 23.8 | 26.0            | 27.0            | 28.3            |
| Tem_T2 (°C)                                   | 16.0 (8.5)  | 16.9 (12.6)  | -8.9           | 0.6            | 5.0             | 10.3 | 22.9 | 26.3            | 27.7            | 28.8            |
| Tem_T3 (°C)                                   | 16.2 (9.2)  | 17.9 (14.5)  | -8.4           | -0.2           | 3.7             | 9.5  | 24   | 27              | 27.9            | 28.8            |
| PM <sub>2.5</sub> _Total (µg/m <sup>3</sup> ) | 51.6 (18.3) | 49.4 (24.6)  | 23.2           | 27.1           | 29.5            | 37.6 | 62.2 | 77.5            | 87.9            | 102.2           |
| PM <sub>2.5</sub> _T1 (µg/m <sup>3</sup> )    | 51.6 (21.5) | 46.7 (28.4)  | 21.1           | 24.7           | 27.6            | 35.7 | 64.1 | 80.8            | 92.4            | 116.2           |
| PM <sub>2.5</sub> _T2 (µg/m <sup>3</sup> )    | 52.3 (24.4) | 45.9 (28.5)  | 18.7           | 23.6           | 26.6            | 35.2 | 63.7 | 84.0            | 104.5           | 134.3           |
| PM <sub>2.5</sub> _T3 (µg/m <sup>3</sup> )    | 50.4 (24.1) | 43.7 (28.9)  | 18.7           | 22.7           | 25.8            | 33.2 | 62.2 | 83.3            | 100.3           | 129             |
| O <sub>3</sub> _Total (µg/m <sup>3</sup> )    | 50.1 (17.8) | 49.7 (24.3)  | 14.0           | 20.9           | 26.3            | 37.9 | 62.1 | 72.5            | 82.2            | 92.9            |
| O <sub>3</sub> _T1 (µg/m <sup>3</sup> )       | 50.0 (11.4) | 49.2 (14.8)  | 26.4           | 32.8           | 35.5            | 42.1 | 56.9 | 65.4            | 71.2            | 81.0            |
| O <sub>3</sub> _T2 (µg/m <sup>3</sup> )       | 49.5 (18.5) | 49.5 (28.3)  | 14.6           | 20.5           | 24.7            | 35.1 | 63.4 | 72.9            | 80.3            | 92.5            |
| O <sub>3</sub> _T3 (µg/m <sup>3</sup> )       | 50.8 (19.3) | 50.4 (26.2)  | 15             | 19.6           | 23.9            | 37.5 | 63.7 | 75.9            | 84.8            | 96.6            |
| <b>Acute exposure</b>                         |             |              |                |                |                 |      |      |                 |                 |                 |

| <b>All subjects (N=70,818)</b>             |             |             |      |      |      |      |      |      |       |       |
|--------------------------------------------|-------------|-------------|------|------|------|------|------|------|-------|-------|
| Tem_1w (°C)                                | 16.6 (9.6)  | 18.6 (14.6) | -9.3 | -1.0 | 3.2  | 9.8  | 24.4 | 27.2 | 28.5  | 30.8  |
| PM <sub>2.5</sub> _1w (µg/m <sup>3</sup> ) | 49.8 (30.1) | 41.5 (30.1) | 12.3 | 18.8 | 22.7 | 30.1 | 60.3 | 87.2 | 107.7 | 170.6 |
| O3_1w (µg/m <sup>3</sup> )                 | 54.1 (23.8) | 51.8 (32.7) | 9.6  | 16.7 | 23.6 | 37.3 | 69.9 | 87.2 | 94.6  | 115.6 |
| Tem_2w (°C)                                | 16.6 (9.5)  | 18.4 (14.9) | -9.0 | -1.0 | 3.5  | 9.5  | 24.4 | 27.2 | 28.4  | 30.1  |
| PM <sub>2.5</sub> _2w (µg/m <sup>3</sup> ) | 50.2 (27.8) | 42.4 (29.9) | 13.9 | 20.3 | 24.2 | 31.8 | 61.7 | 84.7 | 108.2 | 152.6 |
| O3_2w (µg/m <sup>3</sup> )                 | 54.2 (22.8) | 53.2 (31.2) | 10.4 | 18.1 | 24.5 | 38.3 | 69.5 | 86.2 | 92.5  | 110.4 |
| <b>PTB=0 (N=65,853)</b>                    |             |             |      |      |      |      |      |      |       |       |
| Tem_1w (°C)                                | 16.6 (9.6)  | 18.6 (14.6) | -9.3 | -1.0 | 3.2  | 9.8  | 24.4 | 27.2 | 28.5  | 30.8  |
| PM <sub>2.5</sub> _1w (µg/m <sup>3</sup> ) | 49.9 (30.2) | 41.5 (30.3) | 12.3 | 18.8 | 22.7 | 30.2 | 60.5 | 87.6 | 107.8 | 170.6 |
| O3_1w (µg/m <sup>3</sup> )                 | 54.2 (23.9) | 52.0 (32.7) | 9.6  | 16.7 | 23.6 | 37.4 | 70.1 | 87.5 | 94.8  | 115.9 |
| Tem_2w (°C)                                | 16.6 (9.5)  | 18.5 (14.9) | -9.0 | -1.0 | 3.5  | 9.5  | 24.4 | 27.2 | 28.4  | 30.0  |
| PM <sub>2.5</sub> _2w (µg/m <sup>3</sup> ) | 50.3 (27.9) | 42.5 (30.1) | 13.9 | 20.3 | 24.2 | 31.8 | 62.0 | 84.9 | 108.6 | 153.4 |
| O3_2w (µg/m <sup>3</sup> )                 | 54.4 (22.9) | 53.2 (31.4) | 10.4 | 18.1 | 24.5 | 38.4 | 69.8 | 86.4 | 92.7  | 110.6 |
| <b>PTB=1 (N=4,965)</b>                     |             |             |      |      |      |      |      |      |       |       |
| Tem_1w (°C)                                | 16.5 (9.5)  | 18.4 (14.9) | -9.5 | -0.6 | 3.6  | 9.4  | 24.3 | 27.2 | 28.6  | 31.3  |
| PM <sub>2.5</sub> _1w (µg/m <sup>3</sup> ) | 48.4 (28.5) | 40.9 (28.6) | 12.8 | 18.9 | 22.8 | 29.9 | 58.5 | 82.7 | 104.2 | 154.2 |
| O3_1w (µg/m <sup>3</sup> )                 | 52 (22.6)   | 49.6 (31.2) | 9.4  | 16.6 | 23.7 | 36.3 | 67.5 | 82.1 | 91.2  | 112.5 |
| Tem_2w (°C)                                | 16.5 (9.4)  | 18.2 (15.1) | -8.6 | -0.7 | 3.8  | 9.3  | 24.4 | 27.2 | 28.4  | 30.4  |
| PM <sub>2.5</sub> _2w (µg/m <sup>3</sup> ) | 48.6 (26.2) | 41.5 (27.4) | 14.1 | 20.2 | 23.7 | 31.7 | 59.1 | 81.4 | 102.8 | 148.5 |
| O3_2w (µg/m <sup>3</sup> )                 | 51.9 (21.5) | 50.6 (28.7) | 10.2 | 17.4 | 24.1 | 37.3 | 65.9 | 81   | 88.8  | 108.5 |

Notes: PTB: preterm birth; P<sub>1</sub>, P<sub>5</sub>, P<sub>10</sub>, Q<sub>1</sub>, Q<sub>3</sub>, P<sub>90</sub>, P<sub>95</sub>, P<sub>99</sub> refer to the 1<sup>st</sup>, 5<sup>th</sup>, 10<sup>th</sup>, 25<sup>th</sup>, 75<sup>th</sup>, 90<sup>th</sup>, 95<sup>th</sup> and 99<sup>th</sup> percentile of the daily mean temperature for different time windows; Tem\_Total: total pregnancy; Tem\_T1: the first trimester; Tem\_T2: the second trimester; Tem\_T3: the third trimester; Tem\_1w: one week before delivery.

**Table S3. Basic characteristics of temperature exposure by delivery hospitals and geographic regions in the China Labor and Delivery Survey (N=70,818).**

| Items        | Region | Chronic exposure               |                                          |                                          |                                          | Acute exposure        |                       |
|--------------|--------|--------------------------------|------------------------------------------|------------------------------------------|------------------------------------------|-----------------------|-----------------------|
|              |        | Whole pregnancy<br>[Mean (SD)] | 1 <sup>st</sup> trimester<br>[Mean (SD)] | 2 <sup>nd</sup> trimester<br>[Mean (SD)] | 3 <sup>rd</sup> trimester<br>[Mean (SD)] | 1 week<br>[Mean (SD)] | 2 week<br>[Mean (SD)] |
| Hospital ID  |        |                                |                                          |                                          |                                          |                       |                       |
| 1 (N=582)    | North  | 12.6 (2.8)                     | 1.3 (5.2)                                | 14.0 (7.2)                               | 21.8 (3.7)                               | 18.9 (8.5)            | 19.5 (8.3)            |
| 2 (N=1,041)  | North  | 9.7 (2.1)                      | 17.6 (8.1)                               | 6.5 (8.8)                                | 5.2 (9.8)                                | 9.8 (12.2)            | 9.8 (12.2)            |
| 3 (N=1,497)  | North  | 11.9 (3.6)                     | 10.4 (9.6)                               | 11.8 (10.6)                              | 13.6 (9.3)                               | 13.3 (10.4)           | 13.4 (10.2)           |
| 4 (N=497)    | North  | 13.8 (3.0)                     | 13.5 (9.3)                               | 12.1 (8.9)                               | 15.7 (8.9)                               | 17.6 (8.8)            | 17.6 (8.8)            |
| 5 (N=100)    | North  | 9.3 (1.0)                      | 14.4 (9.5)                               | 3.5 (4.4)                                | 9.9 (9.6)                                | 16.7 (7.9)            | 16 (8.8)              |
| 6 (N=2,727)  | North  | 14.0 (3.0)                     | 18.7 (8.1)                               | 12.4 (9.4)                               | 11.0 (9.2)                               | 12.7 (7.3)            | 13 (7.5)              |
| 7 (N=975)    | North  | 8.9 (3.3)                      | 7.4 (10.9)                               | 6.4 (10.2)                               | 12.8 (10.7)                              | 15.0 (8.8)            | 14.8 (9.0)            |
| 8 (N=380)    | North  | 7.5 (3.2)                      | 7.7 (12.7)                               | 6.4 (9.9)                                | 8.3 (12.3)                               | 9.9 (12.8)            | 10.3 (12.7)           |
| 9 (N=923)    | North  | 15.1 (0.7)                     | 13.0 (8.1)                               | 21.2 (2.5)                               | 11.0 (9.4)                               | 3.4 (10.1)            | 4.2 (10.0)            |
| 10 (N=241)   | North  | 10.1 (2.8)                     | 10.5 (9.3)                               | 8.2 (8.6)                                | 11.7 (10.0)                              | 13.8 (10.2)           | 14.1 (10.1)           |
| 11 (N=1,471) | North  | 5.5 (1.2)                      | 22.1 (1.2)                               | 9.9 (4.5)                                | -14.3 (1.1)                              | -11.3 (4)             | -13.3 (3.3)           |
| 12 (N=1,005) | North  | 11.1 (0.5)                     | 18.4 (2.0)                               | 3.8 (1.0)                                | 11.4 (1.3)                               | 19.9 (1.8)            | 19.1 (0.8)            |
| 13 (N=1,010) | North  | 14.1 (2.2)                     | 5.4 (4.9)                                | 13.6 (6.6)                               | 23.0 (4.6)                               | 22.5 (7.1)            | 22.4 (7.0)            |
| 14 (N=683)   | North  | 14.3 (2.6)                     | 12.3 (4.7)                               | 10.0 (8.3)                               | 20.2 (3.9)                               | 24.7 (3.2)            | 24.7 (2.7)            |
| 15 (N=101)   | North  | 10.5 (2.6)                     | 12.8 (6.2)                               | 10.1 (8.5)                               | 8.7 (5.6)                                | 9.3 (8.0)             | 9.1 (7.9)             |
| 16 (N=1,029) | North  | 15.6 (3.1)                     | 20.6 (5.3)                               | 14.5 (9.2)                               | 11.9 (6.3)                               | 14.2 (8.2)            | 13.8 (8.1)            |
| 17 (N=624)   | North  | 15.3 (1.9)                     | 19.1 (8.6)                               | 13.8 (5.7)                               | 13.1 (8.8)                               | 16.4 (6.8)            | 15.8 (7.0)            |
| 18 (N=126)   | North  | 16.6 (1.4)                     | 13.3 (9.4)                               | 21.4 (3.4)                               | 14.9 (10.0)                              | 9.7 (10.1)            | 9.4 (10.7)            |
| 19 (N=507)   | North  | 15.2 (2.6)                     | 17.4 (7.2)                               | 14.0 (8.7)                               | 14.2 (7.7)                               | 15.9 (8.3)            | 16 (8.2)              |
| 20 (N=1,000) | North  | 13.0 (0.2)                     | 16.8 (1.3)                               | 18.7 (0.7)                               | 4.0 (1.3)                                | -0.6 (3.0)            | 0.7 (1.3)             |
| 21 (N=135)   | North  | 10.2 (3.5)                     | 13.1 (8.2)                               | 7.0 (11.0)                               | 10.7 (8.3)                               | 13.3 (13.5)           | 13.1 (13.1)           |
| 22 (N=82)    | North  | 9.2 (1.1)                      | 6.0 (8.8)                                | 4.9 (4.1)                                | 16.2 (8.5)                               | 20.7 (8.5)            | 20.5 (8.5)            |
| 23 (N=54)    | North  | 13.4 (3.2)                     | 22.4 (3.1)                               | 13.3 (10.4)                              | 4.9 (3.5)                                | 6.1 (9.7)             | 6.1 (9.3)             |
| 24 (N=472)   | North  | 11.4 (3.7)                     | 14.4 (8.5)                               | 14.0 (10.7)                              | 6.4 (9.5)                                | 4.5 (7.6)             | 4.3 (7.4)             |
| 25 (N=59)    | North  | 9.6 (3.1)                      | 9.2 (10.2)                               | 8.3 (9.6)                                | 11.2 (10.2)                              | 12.7 (10.6)           | 12.8 (10.4)           |
| 26 (N=1,077) | North  | 5.0 (3.8)                      | 7.0 (12.3)                               | 4.9 (12.1)                               | 3.2 (12.2)                               | 3.8 (13.9)            | 3.7 (13.8)            |
| 27 (N=83)    | North  | 11.9 (2.5)                     | 11.7 (12.5)                              | 13.3 (6.0)                               | 10.4 (13.1)                              | 10.3 (13.1)           | 10.7 (12.9)           |
| 28 (N=75)    | North  | 3.8 (1.7)                      | 9.5 (8.9)                                | -3.5 (7.4)                               | 5.5 (9.6)                                | 12.9 (11.5)           | 12.4 (10.8)           |
| 29 (N=600)   | East   | 10.2 (0.4)                     | 10.6 (2.4)                               | 3.7 (1.6)                                | 16.2 (1.2)                               | 21.5 (0.4)            | 21.5 (0.2)            |
| 30 (N=1,642) | East   | 16.7 (2.6)                     | 23.2 (2.0)                               | 15.9 (7.8)                               | 11.1 (1.6)                               | 13.6 (5.8)            | 13.1 (5.1)            |
| 31 (N=1,206) | East   | 18.1 (2.0)                     | 15.2 (6.7)                               | 17.2 (5.8)                               | 21.6 (5.9)                               | 22.3 (5.1)            | 22.3 (4.8)            |
| 32 (N=93)    | East   | 16.0 (1.3)                     | 17.9 (8.6)                               | 14.2 (4.9)                               | 16.2 (8.4)                               | 18.4 (8.3)            | 18.8 (8.4)            |
| 33 (N=93)    | East   | 19.3 (1.8)                     | 14.4 (5.6)                               | 21.1 (4.9)                               | 22.1 (5.4)                               | 19.0 (8.8)            | 19.7 (8.4)            |
| 34 (N=634)   | East   | 19.3 (0.5)                     | 10.3 (1.2)                               | 22.6 (1.1)                               | 24.6 (0.5)                               | 18.9 (0.6)            | 19.3 (0.6)            |
| 35 (N=935)   | East   | 18.9 (2.4)                     | 16.7 (5.6)                               | 19.1 (7.1)                               | 20.7 (4.9)                               | 19.6 (4.3)            | 20.2 (3.5)            |
| 36 (N=771)   | East   | 16.3 (2.1)                     | 16.5 (7.8)                               | 14.8 (6.1)                               | 17.4 (7.9)                               | 20.3 (7.7)            | 20.0 (7.6)            |
| 37 (N=1,380) | East   | 17.1 (2.2)                     | 16.5 (7.7)                               | 17.2 (6.3)                               | 17.4 (7.5)                               | 17.3 (2.1)            | 16.7 (2.6)            |
| 38 (N=4,865) | East   | 20.2 (1.4)                     | 21.4 (6.6)                               | 19.5 (4.3)                               | 19.6 (6.8)                               | 21.1 (6.9)            | 20.7 (7.0)            |

|              |       |            |            |             |            |            |            |
|--------------|-------|------------|------------|-------------|------------|------------|------------|
| 39 (N=94)    | East  | 20.5 (1.7) | 20.5 (5.1) | 19.7 (5.6)  | 21.3 (5.0) | 22.2 (5.6) | 22.4 (5.4) |
| 40 (N=758)   | East  | 16.3 (2.1) | 13.8 (7.9) | 15.9 (6.4)  | 19.1 (7.9) | 20.1 (9.4) | 20 (9.4)   |
| 41 (N=508)   | East  | 17.3 (1.4) | 24.4 (1.7) | 18.1 (4.5)  | 9.4 (1.5)  | 9.8 (4.9)  | 9.8 (4.0)  |
| 42 (N=467)   | East  | 14.8 (1.2) | 20.4 (5.6) | 10.7 (4.4)  | 13.5 (5.6) | 17.9 (6.9) | 17.4 (6.7) |
| 43 (N=815)   | East  | 20.9 (1.7) | 18.3 (6.0) | 21.3 (5.0)  | 23.1 (4.8) | 21.8 (5.3) | 21.9 (5.2) |
| 44 (N=818)   | East  | 21.5 (1.6) | 21.1 (5.2) | 21.4 (5.3)  | 22.0 (4.3) | 21.4 (5.6) | 21.3 (5.7) |
| 45 (N=69)    | East  | 17.7 (2.5) | 12.6 (4.5) | 18.5 (7.2)  | 21.8 (4.1) | 18.9 (6.8) | 19.2 (6.8) |
| 46 (N=838)   | East  | 16.4 (0.4) | 6.4 (0.4)  | 16.3 (1.6)  | 26.0 (0.3) | 25.5 (0.8) | 25.4 (0.2) |
| 47 (N=945)   | East  | 15.7 (2.3) | 16.5 (7.4) | 14.5 (7.2)  | 16.0 (8.1) | 18.3 (7.4) | 18.2 (7.7) |
| 48 (N=1,964) | East  | 18.9 (1.5) | 20.4 (5.5) | 21.5 (3.6)  | 14.9 (6.2) | 13.7 (4.8) | 13.0 (5.0) |
| 49 (N=807)   | East  | 13.9 (3.4) | 18.5 (5.7) | 12.3 (10.1) | 11.0 (6.2) | 13.2 (4.3) | 12.9 (4.1) |
| 50 (N=342)   | East  | 13.3 (2.8) | 16.3 (6.8) | 12.1 (8.4)  | 11.7 (7.2) | 12.7 (6.9) | 12.8 (6.9) |
| 51 (N=955)   | East  | 17.1 (2.7) | 20.9 (5.6) | 17.9 (7.5)  | 12.5 (6.8) | 12.4 (4.9) | 12.2 (4.7) |
| 52 (N=129)   | East  | 17.8 (2.5) | 14.8 (6.3) | 19.8 (6.9)  | 18.8 (7.4) | 15.4 (8.6) | 15.2 (8.8) |
| 53 (N=438)   | East  | 16.6 (2.1) | 12.6 (7.5) | 17.3 (6.2)  | 19.9 (8.2) | 18.6 (9.1) | 18.7 (9.1) |
| 54 (N=483)   | East  | 19.0 (0.3) | 23.5 (0.9) | 24.6 (1.0)  | 9.3 (0.9)  | 0.9 (1.5)  | 2.0 (1.2)  |
| 55 (N=939)   | East  | 15.4 (2.5) | 17.0 (6.7) | 12.5 (7.1)  | 16.7 (6.4) | 19 (6.2)   | 18.8 (5.8) |
| 56 (N=622)   | East  | 20.4 (1.7) | 14.0 (2.1) | 20.9 (5.1)  | 26.1 (1.5) | 24.8 (4.1) | 25.2 (3.9) |
| 57 (N=1,732) | East  | 19.3 (1.0) | 24.1 (5.2) | 16.3 (3.8)  | 17.8 (5.0) | 22.1 (5.3) | 21.4 (5.8) |
| 58 (N=103)   | South | 21.1 (0.3) | 28.1 (0.4) | 19.4 (1.4)  | 16.0 (0.6) | 22.0 (1.9) | 21.3 (0.9) |
| 59 (N=935)   | South | 21.0 (0.3) | 27.9 (0.6) | 18.9 (1.4)  | 16.5 (0.7) | 22.5 (2.1) | 21.9 (0.6) |
| 60 (N=269)   | South | 21.6 (0.3) | 27.4 (0.9) | 16.9 (0.8)  | 20.5 (0.8) | 26.7 (1.7) | 25.9 (1.2) |
| 61 (N=810)   | South | 20.5 (0.5) | 16.4 (3.2) | 26.3 (0.6)  | 18.6 (3.4) | 10.3 (3.2) | 10.5 (3.1) |
| 62 (N=1,244) | South | 16.8 (3.1) | 13.7 (6.8) | 16.6 (7.3)  | 20.4 (6.7) | 20.2 (7.8) | 20.3 (7.8) |
| 63 (N=353)   | South | 18.5 (0.5) | 8.0 (1.1)  | 21.4 (1.2)  | 25.7 (0.3) | 21.4 (1.3) | 22.0 (0.9) |
| 64 (N=142)   | South | 14.0 (0.6) | 23.7 (1.6) | 9.4 (1.5)   | 9.2 (0.9)  | 15.9 (2.5) | 14.5 (2.0) |
| 65 (N=1,805) | South | 16.5 (1.6) | 19.5 (6.2) | 15.1 (5.8)  | 15.0 (6.9) | 16.9 (8.3) | 16.3 (8.7) |
| 66 (N=718)   | South | 17.7 (1.9) | 18.9 (7.6) | 16.6 (5.7)  | 17.4 (7.8) | 19.1 (7.7) | 19.1 (7.7) |
| 67 (N=778)   | South | 17.4 (2.1) | 15.7 (6.8) | 17.0 (6.8)  | 19.5 (6.6) | 20 (10.8)  | 19.9 (9.9) |
| 68 (N=118)   | South | 21.6 (1.7) | 21.3 (5.2) | 20.9 (5.3)  | 22.6 (5.5) | 24.4 (4.1) | 24.2 (4.4) |
| 69 (N=1,172) | South | 22.9 (1.6) | 20.1 (4.2) | 23.6 (4.7)  | 25.0 (4.0) | 24.5 (3.6) | 24.4 (3.7) |
| 70 (N=441)   | South | 24.7 (1.8) | 25.8 (1.8) | 23.4 (4.6)  | 24.9 (3.6) | 27.6 (1.3) | 27.5 (1.5) |
| 71 (N=645)   | South | 25.7 (0.3) | 24.2 (3.5) | 28.4 (0.8)  | 24.4 (3.2) | 21.5 (3.9) | 21.8 (3.7) |
| 72 (N=475)   | South | 24.4 (1.4) | 22.8 (4.9) | 26.8 (2.5)  | 23.6 (5.3) | 22.3 (4.2) | 22.5 (4.0) |
| 73 (N=543)   | South | 25.2 (0.3) | 21.9 (1.1) | 28.2 (0.2)  | 25.3 (0.5) | 20.6 (2.4) | 22.1 (0.9) |
| 74 (N=660)   | South | 24.4 (0.3) | 21.7 (2.0) | 27.8 (0.4)  | 23.6 (1.7) | 18.4 (4.2) | 18.6 (3.6) |
| 75 (N=634)   | South | 21.6 (1.6) | 24.2 (4.9) | 20.9 (5.5)  | 19.9 (5.2) | 19.5 (8.8) | 20.1 (7.9) |
| 76 (N=267)   | South | 26.1 (0.2) | 25.2 (1.2) | 29.2 (0.3)  | 23.9 (0.8) | 16.6 (1.4) | 17 (1.2)   |
| 77 (N=1,010) | West  | 7.6 (0.6)  | 19.3 (0.4) | 10.3 (2.7)  | -6.6 (0.8) | -4.9 (2.1) | -5.5 (1.0) |
| 78 (N=717)   | West  | 13.6 (2.8) | 14.7 (7.9) | 14.9 (7.7)  | 11.2 (7.7) | 10.7 (7.1) | 10.5 (6.9) |
| 79 (N=1,406) | West  | 16.2 (2.0) | 14.6 (5.2) | 14.5 (6.5)  | 19.2 (4.8) | 19.7 (7.1) | 20.0 (6.8) |
| 80 (N=67)    | West  | 18.6 (2.2) | 20.1 (6.8) | 18.8 (5.8)  | 16.9 (7.1) | 17.6 (6.1) | 17 (6.0)   |
| 81 (N=516)   | West  | 18.6 (1.7) | 17.6 (6.6) | 19.3 (4.5)  | 18.8 (7.0) | 17.5 (6.7) | 17.8 (7.3) |
| 82 (N=66)    | West  | 16.6 (1.5) | 16.1 (3.1) | 17.2 (3.7)  | 16.3 (2.7) | 14.2 (5.6) | 14.2 (5.4) |

|                     |      |            |             |             |             |             |             |
|---------------------|------|------------|-------------|-------------|-------------|-------------|-------------|
| 83 (N=174)          | West | 14.5 (0.5) | 13.4 (3.8)  | 11.9 (2.7)  | 17.9 (2.4)  | 19.9 (0.9)  | 19.9 (0.2)  |
| 84 (N=78)           | West | 13.4 (2.0) | 12.9 (4.0)  | 13.8 (5.8)  | 13.4 (3.6)  | 11.0 (6.6)  | 11.2 (6.8)  |
| 85 (N=632)          | West | 19.3 (1.9) | 19.0 (6.9)  | 19.1 (5.2)  | 19.7 (6.5)  | 20.3 (7.0)  | 20.2 (7.0)  |
| 86 (N=873)          | West | 9.6 (1.8)  | 8.1 (10.1)  | 13.2 (4.0)  | 7.5 (11.0)  | 4.1 (8.6)   | 4.3 (9.0)   |
| 87 (N=675)          | West | 13.5 (1.5) | 15.2 (9.0)  | 10.8 (6.0)  | 14.5 (9.5)  | 18.3 (10.7) | 17.9 (10.7) |
| 88 (N=1,538)        | West | 17.6 (1.4) | 16.6 (5.4)  | 21.1 (3.8)  | 15.1 (5.9)  | 10.8 (5.8)  | 10.8 (5.7)  |
| 89 (N=494)          | West | 19.3 (2.5) | 21.0 (4.5)  | 19.1 (7.4)  | 17.9 (4.7)  | 17.5 (8.1)  | 17.5 (8.1)  |
| 90 (N=524)          | West | 17.7 (2.5) | 18.7 (4.6)  | 17.7 (7.5)  | 16.7 (5.1)  | 16.5 (8.1)  | 16.2 (7.3)  |
| 91 (N=881)          | West | 7.9 (2.1)  | 7.7 (8.7)   | 3.8 (6.6)   | 12.1 (8.3)  | 17.4 (5.5)  | 17.1 (5.7)  |
| 92 (N=1,504)        | West | 15.8 (2.1) | 18.2 (5.7)  | 16.2 (5.6)  | 13.2 (6.7)  | 14.0 (6.9)  | 14.0 (6.4)  |
| 93 (N=1,325)        | West | 17.6 (1.3) | 12.9 (8.4)  | 21.9 (4.2)  | 17.8 (8.7)  | 12.2 (10.5) | 13.1 (10.6) |
| 94 (N=163)          | West | 17.7 (2.2) | 18.4 (4.6)  | 16.1 (6.3)  | 18.7 (5.2)  | 20.4 (5.0)  | 20.3 (4.1)  |
| 95 (N=871)          | West | 15.1 (1.2) | 18.4 (3.1)  | 14.4 (3.6)  | 12.5 (3.8)  | 13.9 (5.5)  | 13.5 (5.5)  |
| 96 (N=794)          | West | 18.0 (2.2) | 18.9 (6.2)  | 17.9 (6.2)  | 17.3 (6.5)  | 17.7 (8.7)  | 17.7 (7.9)  |
| Geographical region |      |            |             |             |             |             |             |
| North (N=19,927)    |      | 11.3 (4.5) | 12.9 (10.1) | 10.1 (10.4) | 10.9 (10.4) | 12.4 (11.3) | 12.4 (11.2) |
| East (N=23,640)     |      | 17.3 (3.1) | 17.7 (7.1)  | 16.8 (7.2)  | 17.4 (7.4)  | 18.0 (7.5)  | 17.9 (7.5)  |
| South (N=13,192)    |      | 20.6 (3.3) | 20.3 (6.5)  | 20.3 (6.4)  | 21.3 (6.4)  | 22.2 (6.8)  | 22.1 (6.7)  |
| West (N=14,059)     |      | 15.8 (3.8) | 15.9 (7.6)  | 16.2 (7.0)  | 15.4 (7.9)  | 14.9 (8.9)  | 14.9 (8.8)  |



**Table S4. Extreme climate event exposure by time periods and outcomes in the China Labor and Delivery Survey (N=70,818).**

| Variable         | 1w before delivery           |                       |                  |                 | 2w before delivery           |                       |                  |                 |
|------------------|------------------------------|-----------------------|------------------|-----------------|------------------------------|-----------------------|------------------|-----------------|
|                  | [Mean (SD)]                  |                       |                  | <i>p</i> -value | [Mean (SD)]                  |                       |                  | <i>p</i> -value |
|                  | Total subjects<br>(N=70,818) | non-PTB<br>(N=65,853) | PTB<br>(N=4,965) |                 | Total subjects<br>(N=70,818) | non-PTB<br>(N=65,853) | PTB<br>(N=4,965) |                 |
| Fifth-days (day) | 0.4 (1.1)                    | 0.3 (1.1)             | 0.4 (1.2)        | <0.001          | 0.7 (2.0)                    | 0.3 (1.0)             | 0.8 (2.3)        | <0.001          |
| Fifth-2D (event) | 0.1 (0.3)                    | 0.1 (0.3)             | 0.1 (0.3)        | <0.001          | 0.3 (0.9)                    | 0.2 (0.5)             | 0.3 (1.0)        | <0.001          |
| 10th-days (day)  | 0.6 (1.5)                    | 0.6 (1.5)             | 0.7 (1.7)        | <0.001          | 0.3 (0.7)                    | 0.7 (2.0)             | 0.3 (0.8)        | <0.001          |
| 10th-3D (event)  | 0.2 (0.5)                    | 0.2 (0.5)             | 0.2 (0.6)        | <0.001          | 0.5 (1.3)                    | 0.3 (0.9)             | 0.6 (1.4)        | <0.001          |
| 10th-2D (event)  | 0.2 (0.7)                    | 0.2 (0.7)             | 0.3 (0.7)        | <0.001          | 1.2 (2.8)                    | 0.3 (0.7)             | 1.3 (2.8)        | <0.001          |
| 90th-days (day)  | 0.6 (1.5)                    | 0.6 (1.5)             | 0.6 (1.6)        | 0.56            | 0.3 (0.7)                    | 0.5 (1.3)             | 0.3 (0.7)        | 0.41            |
| 90th-3D (event)  | 0.2 (0.7)                    | 0.2 (0.7)             | 0.2 (0.7)        | 0.77            | 0.5 (1.3)                    | 1.2 (2.8)             | 0.5 (1.3)        | 0.87            |
| 90th-2D (event)  | 0.2 (0.7)                    | 0.2 (0.7)             | 0.2 (0.7)        | 0.41            | 0.6 (1.8)                    | 0.3 (0.7)             | 0.6 (1.8)        | 0.26            |
| 95th-days (day)  | 0.3 (1.0)                    | 0.3 (1.0)             | 0.3 (1.1)        | 0.08            | 0.2 (0.8)                    | 0.5 (1.2)             | 0.2 (0.8)        | 0.04            |
| 95th-2D (event)  | 0.2 (0.5)                    | 0.2 (0.5)             | 0.3 (0.6)        | 0.001           | 0.7 (2.0)                    | 0.6 (1.8)             | 0.8 (2.3)        | 0.71            |

Notes: Group difference was examined by Wilcoxon's rank sum test, where  $P < 0.05$  was considered to be significant.

PTB: preterm birth. Fifth-days, 10th-days, 95th-days, and 90th-days represent the total number of days when the daily mean temperature was lower than the Fifth or the 10th percentile or higher than the 95th or the 90th percentile, respectively. Fifth-2D, 10th-3D, 10th-2D, 95th-2D, 90th-3D and 90th-2D represent the total number of extreme weather events. An extreme weather event can be defined as the daily mean temperature below the Fifth percentile or higher than the 95th percentile for two consecutive days or the daily mean temperature below the 10th percentile or higher than the 90th percentile for two or three consecutive days.

**Table S5. Associations of extreme climate events with early and late preterm birth in the China Labor and Delivery Survey.**

| Extreme events | Early PTB [OR (95% CI)]<br>N=1,983 |                    | Late PTB [OR (95% CI)]<br>N=2,982 |                    |
|----------------|------------------------------------|--------------------|-----------------------------------|--------------------|
|                | 1w before delivery                 | 2w before delivery | 1w before delivery                | 2w before delivery |
| Fifth-days     | 1.05 (1.00, 1.10)                  | 1.02 (0.99, 1.05)  | 1.09 (1.05, 1.13)                 | 1.04 (1.02, 1.07)  |
| Fifth-2D       | 1.10 (0.90, 1.34)                  | 1.04 (0.98, 1.10)  | 1.26 (1.08, 1.48)                 | 1.10 (1.05, 1.15)  |
| 10th-days      | 1.04 (1.00, 1.08)                  | 1.02 (1.00, 1.04)  | 1.08 (1.05, 1.12)                 | 1.04 (1.02, 1.06)  |
| 10th-3D        | 1.04 (0.94, 1.14)                  | 1.03 (0.95, 1.11)  | 1.13 (1.05, 1.22)                 | 1.13 (1.07, 1.20)  |
| 10th-2D        | 1.07 (0.98, 1.17)                  | 1.03 (0.98, 1.08)  | 1.17 (1.09, 1.25)                 | 1.08 (1.04, 1.12)  |
| 90th-days      | 0.96 (0.93, 1.00)                  | 0.98 (0.96, 1.01)  | 0.96 (0.93, 0.99)                 | 0.99 (0.97, 1.01)  |
| 90th-3D        | 0.94 (0.87, 1.03)                  | 0.97 (0.89, 1.04)  | 0.90 (0.83, 0.97)                 | 0.99 (0.93, 1.06)  |
| 90th-2D        | 0.99 (0.90, 1.07)                  | 0.97 (0.93, 1.02)  | 0.95 (0.88, 1.02)                 | 0.98 (0.94, 1.02)  |
| 95th-days      | 0.99 (0.94, 1.04)                  | 0.99 (0.96, 1.03)  | 0.98 (0.93, 1.02)                 | 0.99 (0.97, 1.02)  |
| 95th-2D        | 1.07 (0.98, 1.18)                  | 1.01 (0.94, 1.08)  | 1.09 (1.01, 1.18)                 | 0.96 (0.91, 1.02)  |

Notes: Generalized linear mixed model was used to examine the associations. All models were adjusted for maternal age, maternal ethnicity, maternal education, insurance type, child sex, parity, GDP per capita, geographic region, conception season, conception year, PM<sub>2.5</sub>, and O<sub>3</sub>. PTB: preterm birth. Early PTB: preterm birth of 24-34 gestational weeks; Late PTB: preterm birth of 35-36 gestational weeks. Fifth-days, 10th-days, 95th-days, and 90th-days represent the total number of days when the daily mean temperature was lower than the Fifth or the 10th percentile or higher than the 95th or the 90th percentile, respectively. Fifth-2D, 10th-3D, 10th-2D, 95th-2D, 90th-3D and 90th-2D represent the total number of extreme weather events. An extreme weather event can be defined as the daily mean temperature below the Fifth percentile or higher than the 95th percentile for two consecutive days or the daily mean temperature below the 10th percentile or higher than the 90th percentile for two or three consecutive days.

**Table S6. Associations of extreme climate events with early and late preterm birth in the China Labor and Delivery Survey, stratified by clinical subtypes.**

| Variables               | Spontaneous PTB<br>[OR (95% CI)] | PPROM<br>[OR (95% CI)] | Iatrogenic PTB<br>[OR (95% CI)] |
|-------------------------|----------------------------------|------------------------|---------------------------------|
| Early PTBs              | N=918                            | N=536                  | N=529                           |
| 1 week before delivery  |                                  |                        |                                 |
| Fifth-days              | 1.06 (0.99, 1.14)                | 1.04 (0.95, 1.14)      | 1.03 (0.93, 1.13)               |
| Fifth-2D                | 1.08 (0.81, 1.44)                | 1.18 (0.83, 1.70)      | 1.04 (0.70, 1.55)               |
| 10th-days               | 1.05 (0.99, 1.11)                | 1.05 (0.97, 1.14)      | 1.02 (0.94, 1.10)               |
| 10th-3D                 | 1.12 (0.99, 1.28)                | 1.02 (0.84, 1.22)      | 0.89 (0.73, 1.10)               |
| 10th-2D                 | 1.10 (0.97, 1.24)                | 1.06 (0.89, 1.25)      | 1.04 (0.87, 1.24)               |
| 90th-days               | 0.99 (0.94, 1.05)                | 0.88 (0.81, 0.95)      | 0.97 (0.91, 1.05)               |
| 90th-3D                 | 1.01 (0.89, 1.15)                | 0.79 (0.67, 0.94)      | 0.96 (0.82, 1.13)               |
| 90th-2D                 | 1.08 (0.96, 1.22)                | 0.77 (0.64, 0.93)      | 1.02 (0.87, 1.19)               |
| 95th-days               | 1.02 (0.95, 1.10)                | 0.92 (0.82, 1.02)      | 0.98 (0.89, 1.07)               |
| 95th-2D                 | 1.22 (1.07, 1.39)                | 1.01 (0.84, 1.21)      | 0.90 (0.74, 1.09)               |
| 2 weeks before delivery |                                  |                        |                                 |
| Fifth-days              | 1.03 (0.99, 1.07)                | 1.02 (0.97, 1.08)      | 1.01 (0.95, 1.06)               |
| Fifth-2D                | 1.04 (0.96, 1.14)                | 1.03 (0.92, 1.15)      | 1.04 (0.92, 1.16)               |
| 10th-days               | 1.02 (0.99, 1.06)                | 1.03 (0.98, 1.07)      | 1.01 (0.96, 1.05)               |
| 10th-3D                 | 1.02 (0.92, 1.14)                | 1.07 (0.93, 1.24)      | 1.01 (0.87, 1.17)               |
| 10th-2D                 | 1.04 (0.97, 1.11)                | 1.04 (0.95, 1.14)      | 1.01 (0.92, 1.11)               |
| 90th-days               | 1.02 (0.98, 1.05)                | 0.91 (0.87, 0.96)      | 0.99 (0.94, 1.03)               |
| 90th-3D                 | 1.05 (0.94, 1.17)                | 0.82 (0.69, 0.96)      | 0.97 (0.84, 1.12)               |
| 90th-2D                 | 1.03 (0.96, 1.11)                | 0.86 (0.78, 0.96)      | 0.98 (0.90, 1.07)               |
| 95th-days               | 1.03 (0.99, 1.08)                | 0.93 (0.87, 1.00)      | 0.99 (0.93, 1.05)               |
| 95th-2D                 | 1.10 (1.00, 1.21)                | 0.89 (0.77, 1.03)      | 0.96 (0.85, 1.09)               |
| Late PTBs               | N=1,536                          | N=822                  | N=624                           |
| 1 week before delivery  |                                  |                        |                                 |
| Fifth-days              | 1.08 (1.03, 1.13)                | 1.14 (1.07, 1.22)      | 1.01 (0.92, 1.11)               |
| Fifth-2D                | 1.18 (0.95, 1.46)                | 1.59 (1.20, 2.11)      | 1.05 (0.73, 1.52)               |
| 10th-days               | 1.07 (1.03, 1.12)                | 1.14 (1.07, 1.21)      | 1.02 (0.95, 1.10)               |
| 10th-3D                 | 1.16 (1.05, 1.29)                | 1.16 (1.01, 1.34)      | 1.00 (0.83, 1.19)               |
| 10th-2D                 | 1.16 (1.05, 1.27)                | 1.25 (1.10, 1.42)      | 1.09 (0.93, 1.27)               |

|                         |                   |                   |                   |
|-------------------------|-------------------|-------------------|-------------------|
| 90th-days               | 0.98 (0.94, 1.03) | 0.94 (0.88, 1.00) | 0.94 (0.87, 1.01) |
| 90th-3D                 | 0.89 (0.80, 0.99) | 0.90 (0.79, 1.03) | 0.90 (0.76, 1.07) |
| 90th-2D                 | 0.95 (0.86, 1.05) | 0.99 (0.86, 1.13) | 0.92 (0.77, 1.09) |
| 95th-days               | 0.98 (0.92, 1.04) | 1.00 (0.93, 1.09) | 0.94 (0.84, 1.04) |
| 95th-2D                 | 1.12 (1.01, 1.25) | 1.12 (0.96, 1.29) | 1.00 (0.84, 1.19) |
| 2 weeks before delivery |                   |                   |                   |
| Fifth-days              | 1.04 (1.01, 1.07) | 1.07 (1.03, 1.11) | 1.00 (0.95, 1.06) |
| Fifth-2D                | 1.10 (1.04, 1.17) | 1.14 (1.05, 1.24) | 1.01 (0.91, 1.13) |
| 10th-days               | 1.04 (1.02, 1.07) | 1.07 (1.03, 1.10) | 1.00 (0.96, 1.05) |
| 10th-3D                 | 1.13 (1.05, 1.23) | 1.25 (1.12, 1.39) | 0.99 (0.86, 1.14) |
| 10th-2D                 | 1.08 (1.02, 1.13) | 1.14 (1.06, 1.22) | 1.03 (0.94, 1.12) |
| 90th-days               | 1.00 (0.97, 1.02) | 0.98 (0.94, 1.01) | 1.00 (0.96, 1.05) |
| 90th-3D                 | 1.01 (0.92, 1.10) | 0.92 (0.81, 1.04) | 1.05 (0.91, 1.22) |
| 90th-2D                 | 0.99 (0.94, 1.05) | 0.97 (0.90, 1.05) | 0.99 (0.90, 1.08) |
| 95th-days               | 1.00 (0.97, 1.04) | 0.98 (0.94, 1.04) | 0.98 (0.92, 1.04) |
| 95th-2D                 | 0.98 (0.91, 1.07) | 0.96 (0.86, 1.08) | 0.92 (0.80, 1.06) |

Notes: Generalized linear mixed model was used to examine the associations. All models were adjusted for maternal age, maternal ethnicity, maternal education, insurance type, child sex, parity, GDP per capita, geographic region, conception season, conception year, PM<sub>2.5</sub>, and O<sub>3</sub>. PTB: preterm birth. PPRM: preterm premature rupture of the fetal membranes. Fifth-days, 10th-days, 95th-days and 90th-days represent the total number of days when the daily mean temperature was lower than the Fifth or the 10th percentile or higher than the 95th or the 90th percentile, respectively. Fifth-2D, 10th-3D, 10th-2D, 95th-2D, 90th-3D and 90th-2D represent the total number of extreme weather events. An extreme weather event can be defined as the daily mean temperature below the Fifth percentile or higher than the 95th percentile for two consecutive days or the daily mean temperature below the 10th percentile or higher than the 90th percentile for two or three consecutive days.

**Table S7. Associations of extreme climate events with preterm birth in the China Labor and Delivery Survey, stratified by geographic regions.**

| Variables                      | 1 week before delivery<br>[OR (95% CI)] | 2 weeks before delivery<br>[OR (95% CI)] |
|--------------------------------|-----------------------------------------|------------------------------------------|
| North (case/obs= 1,104/19,927) |                                         |                                          |
| Fifth-days                     | 1.21 (1.14, 1.30)                       | 1.11 (1.07, 1.16)                        |
| Fifth-2D                       | 1.85 (1.36, 2.52)                       | 1.22 (1.12, 1.33)                        |
| 10th-days                      | 1.29 (1.21, 1.36)                       | 1.14 (1.10, 1.18)                        |
| 10th-3D                        | 1.49 (1.30, 1.70)                       | 1.37 (1.23, 1.53)                        |
| 10th-2D                        | 1.60 (1.41, 1.82)                       | 1.27 (1.19, 1.37)                        |
| 90th-days                      | 0.91 (0.86, 0.96)                       | 0.93 (0.90, 0.97)                        |
| 90th-3D                        | 0.83 (0.74, 0.94)                       | 0.81 (0.71, 0.92)                        |
| 90th-2D                        | 0.86 (0.76, 0.98)                       | 0.86 (0.79, 0.93)                        |
| 95th-days                      | 0.88 (0.81, 0.95)                       | 0.90 (0.85, 0.96)                        |
| 95th-2D                        | 1.35 (1.18, 1.55)                       | 0.76 (0.66, 0.87)                        |
| East (case/obs= 1,520/23,640)  |                                         |                                          |
| Fifth-days                     | 0.95 (0.90, 1.01)                       | 0.98 (0.95, 1.01)                        |
| Fifth-2D                       | 0.80 (0.62, 1.04)                       | 0.94 (0.87, 1.01)                        |
| 10th-days                      | 0.97 (0.93, 1.02)                       | 0.99 (0.96, 1.02)                        |
| 10th-3D                        | 0.90 (0.80, 1.02)                       | 0.98 (0.89, 1.07)                        |
| 10th-2D                        | 0.92 (0.82, 1.03)                       | 0.97 (0.92, 1.03)                        |
| 90th-days                      | 1.02 (0.97, 1.07)                       | 1.02 (0.99, 1.04)                        |
| 90th-3D                        | 1.02 (0.92, 1.13)                       | 1.04 (0.96, 1.13)                        |
| 90th-2D                        | 1.05 (0.95, 1.17)                       | 1.03 (0.98, 1.09)                        |
| 95th-days                      | 1.00 (0.95, 1.06)                       | 1.02 (0.99, 1.06)                        |
| 95th-2D                        | 0.99 (0.88, 1.11)                       | 1.04 (0.97, 1.11)                        |
| South (case/obs= 1,040/13,192) |                                         |                                          |
| Fifth-days                     | 1.07 (0.98, 1.16)                       | 1.03 (0.98, 1.09)                        |
| Fifth-2D                       | 1.15 (0.82, 1.59)                       | 1.10 (0.98, 1.24)                        |
| 10th-days                      | 1.01 (0.95, 1.08)                       | 1.00 (0.96, 1.03)                        |
| 10th-3D                        | 0.97 (0.84, 1.11)                       | 0.98 (0.86, 1.12)                        |
| 10th-2D                        | 1.03 (0.90, 1.19)                       | 1.00 (0.92, 1.08)                        |
| 90th-days                      | 0.87 (0.82, 0.93)                       | 0.95 (0.91, 0.98)                        |

|                               |                   |                   |
|-------------------------------|-------------------|-------------------|
| 90th-3D                       | 0.80 (0.71, 0.91) | 0.89 (0.78, 1.01) |
| 90th-2D                       | 0.86 (0.76, 0.97) | 0.92 (0.85, 1.00) |
| 95th-days                     | 0.94 (0.87, 1.01) | 0.95 (0.89, 1.01) |
| 95th-2D                       | 0.96 (0.84, 1.10) | 0.87 (0.76, 1.01) |
| West (case/obs= 1,301/14,059) |                   |                   |
| Fifth-days                    | 1.09 (1.04, 1.14) | 1.04 (1.02, 1.07) |
| Fifth-2D                      | 1.22 (1.01, 1.48) | 1.09 (1.03, 1.16) |
| 10th-days                     | 1.08 (1.03, 1.13) | 1.04 (1.01, 1.07) |
| 10th-3D                       | 1.13 (1.01, 1.26) | 1.12 (1.03, 1.22) |
| 10th-2D                       | 1.16 (1.05, 1.27) | 1.08 (1.03, 1.14) |
| 90th-days                     | 1.09 (1.04, 1.15) | 1.06 (1.02, 1.09) |
| 90th-3D                       | 1.11 (0.98, 1.25) | 1.14 (1.03, 1.26) |
| 90th-2D                       | 1.17 (1.03, 1.32) | 1.10 (1.03, 1.18) |
| 95th-days                     | 1.09 (1.03, 1.17) | 1.05 (1.01, 1.09) |
| 95th-2D                       | 1.15 (1.02, 1.30) | 1.11 (1.02, 1.21) |

Notes: Generalized linear mixed model was used to examine the associations. All models were adjusted for maternal age, maternal ethnicity, maternal education, insurance type, parity, GDP per capita, child sex, conception season, conception year, PM<sub>2.5</sub> and O<sub>3</sub>. PTB: preterm birth.

**Table S8. Associations of extreme climate events with preterm birth in the China Labor and Delivery Survey, stratified by child sex.**

| Variables                       | 1 week before delivery<br>[OR (95% CI)] | 2 weeks before delivery<br>[OR (95% CI)] |
|---------------------------------|-----------------------------------------|------------------------------------------|
| Male (case/obs= 2,863/37,826)   |                                         |                                          |
| Fifth-days                      | 1.05 (1.01, 1.10)                       | 1.01 (0.99, 1.04)                        |
| Fifth-2D                        | 1.12 (0.94, 1.33)                       | 1.03 (0.98, 1.09)                        |
| 10th-days                       | 1.05 (1.02, 1.09)                       | 1.02 (1.00, 1.04)                        |
| 10th-3D                         | 1.08 (0.99, 1.17)                       | 1.04 (0.98, 1.11)                        |
| 10th-2D                         | 1.12 (1.04, 1.20)                       | 1.03 (0.99, 1.08)                        |
| 90th-days                       | 0.92 (0.89, 0.95)                       | 0.96 (0.94, 0.98)                        |
| 90th-3D                         | 0.83 (0.77, 0.90)                       | 0.90 (0.84, 0.97)                        |
| 90th-2D                         | 0.87 (0.81, 0.94)                       | 0.92 (0.89, 0.96)                        |
| 95th-days                       | 0.93 (0.89, 0.97)                       | 0.96 (0.94, 0.99)                        |
| 95th-2D                         | 1.04 (0.96, 1.13)                       | 0.93 (0.87, 0.99)                        |
| Female (case/obs= 2,083/32,872) |                                         |                                          |
| Fifth-days                      | 1.09 (1.04, 1.13)                       | 1.06 (1.03, 1.08)                        |
| Fifth-2D                        | 1.29 (1.07, 1.55)                       | 1.11 (1.06, 1.17)                        |
| 10th-days                       | 1.07 (1.04, 1.12)                       | 1.04 (1.02, 1.07)                        |
| 10th-3D                         | 1.11 (1.02, 1.21)                       | 1.15 (1.07, 1.23)                        |
| 10th-2D                         | 1.13 (1.04, 1.23)                       | 1.09 (1.04, 1.13)                        |
| 90th-days                       | 1.04 (1.00, 1.08)                       | 1.03 (1.01, 1.06)                        |
| 90th-3D                         | 1.08 (0.99, 1.17)                       | 1.11 (1.03, 1.20)                        |
| 90th-2D                         | 1.14 (1.04, 1.24)                       | 1.08 (1.03, 1.13)                        |
| 95th-days                       | 1.06 (1.01, 1.11)                       | 1.04 (1.01, 1.08)                        |
| 95th-2D                         | 1.14 (1.04, 1.25)                       | 1.08 (1.01, 1.15)                        |

Notes: Generalized linear mixed model was used to examine the associations. All models were adjusted for maternal age, maternal ethnicity, maternal education, insurance type, parity, GDP per capita, geographic region, conception season, conception year, PM<sub>2.5</sub>, and O<sub>3</sub>. PTB: preterm birth.

**Table S9. Estimates from the Cox regression investigating associations of temperature exposure with PTB in the China Labor and Delivery Survey (N=70,818).**

| Parameter                 | HR (95% CI)                 | <i>P</i> -value |
|---------------------------|-----------------------------|-----------------|
| 1 <sup>st</sup> trimester |                             |                 |
| TEM_T1_RCS_lin            | 1.02 (1.01, 1.04)           | 0.007           |
| TEM_T1_RCS_S1             | 0.9997 (0.9997, 0.9998)     | <0.001          |
| TEM_T1_RCS_S2             | 1.002 (1.001, 1.002)        | <0.001          |
| TEM_T1_RCS_S3             | 0.995 (0.994, 0.996)        | <0.001          |
| Overall_association       |                             | <0.001          |
| Non_lin_association       |                             | <0.001          |
| 2 <sup>nd</sup> trimester |                             |                 |
| TEM_T2_RCS_lin            | 1.02 (1.00, 1.03)           | 0.051           |
| TEM_T2_RCS_S1             | 0.999998 (0.99994, 1.00006) | 0.947           |
| TEM_T2_RCS_S2             | 0.9996 (0.9992, 0.9999)     | 0.013           |
| TEM_T2_RCS_S3             | 1.002 (1.001, 1.002)        | <0.001          |
| Overall_association       |                             | <0.001          |
| Non_lin_association       |                             | <0.001          |
| 3 <sup>rd</sup> trimester |                             |                 |
| TEM_T3_RCS_lin            | 0.99 (0.97, 1.00)           | 0.038           |
| TEM_T3_RCS_S1             | 1.00002 (0.99996, 1.0001)   | 0.523           |
| TEM_T3_RCS_S2             | 1.00002 (0.9997, 1.0003)    | 0.903           |
| TEM_T3_RCS_S3             | 1.00 (0.999, 1.001)         | 0.963           |
| Overall_association       |                             | <0.001          |
| Non_lin_association       |                             | <0.001          |
| Whole pregnancy           |                             |                 |
| TEM_Total_RCS_lin         | 0.95 (0.93, 0.98)           | <0.001          |
| TEM_Total_RCS_S1          | 0.9997 (0.999, 1.00)        | 0.047           |
| TEM_Total_RCS_S2          | 1.003 (1.001, 1.005)        | 0.005           |
| TEM_Total_RCS_S3          | 0.995 (0.991, 0.999)        | 0.027           |
| Overall_association       |                             | <0.001          |
| Non_lin_association       |                             | <0.001          |

**Notes:** Cox proportional hazard regression incorporated with penalized cubic spline was used to examine exposure-response associations. RCS: restricted cubic spline. The RCS function with 5 knots will generate 1



linear spline (RCS\_lin) and 3 nonlinear association splines (RCS\_S1, RCS\_S2, RCS\_S3). Overall\_association and Non\_lin\_association indicate the statistical test for the overall and the non-linear components, separately. All models were adjusted for maternal age, maternal ethnicity, maternal education, insurance type, child sex, parity, GDP per capita, geographic region, conception season, conception year, PM<sub>2.5</sub>, and O<sub>3</sub>.  $P < 0.05$  indicates significant linear or non-linear association.

**Table S10. Associations of extreme climate events with preterm birth under different temperature definitions in the China Labor and Delivery Survey.**

| Extreme events      | Model 1                      |                            |                           | Model 2                      |                            |                           |
|---------------------|------------------------------|----------------------------|---------------------------|------------------------------|----------------------------|---------------------------|
|                     | Overall PTB<br>[OR (95% CI)] | Early PTB<br>[OR (95% CI)] | Late PTB<br>[OR (95% CI)] | Overall PTB<br>[OR (95% CI)] | Early PTB<br>[OR (95% CI)] | Late PTB<br>[OR (95% CI)] |
| 1w before delivery  | N=4,965                      | N=1,983                    | N=2,982                   | N=4,965                      | N=1,983                    | N=2,982                   |
| Fifth-days          | 1.07 (1.04, 1.10)            | 1.05 (1.00, 1.11)          | 1.09 (1.04, 1.13)         | 1.05 (1.02, 1.09)            | 1.02 (0.97, 1.08)          | 1.07 (1.03, 1.12)         |
| Fifth-2D            | 1.19 (1.08, 1.30)            | 1.18 (1.02, 1.36)          | 1.21 (1.08, 1.36)         | 1.14 (1.07, 1.22)            | 1.12 (1.01, 1.24)          | 1.17 (1.08, 1.27)         |
| 10th-days           | 1.05 (1.02, 1.08)            | 1.03 (0.99, 1.07)          | 1.07 (1.04, 1.11)         | 1.04 (1.02, 1.07)            | 1.03 (0.99, 1.07)          | 1.06 (1.02, 1.09)         |
| 10th-3D             | 1.11 (1.05, 1.17)            | 1.06 (0.98, 1.16)          | 1.15 (1.07, 1.23)         | 1.10 (1.04, 1.16)            | 1.07 (0.98, 1.16)          | 1.14 (1.06, 1.22)         |
| 10th-2D             | 1.10 (1.04, 1.17)            | 1.05 (0.96, 1.15)          | 1.15 (1.07, 1.24)         | 1.08 (1.03, 1.15)            | 1.07 (0.98, 1.17)          | 1.11 (1.03, 1.19)         |
| 90th-days           | 0.98 (0.94, 1.01)            | 0.98 (0.92, 1.03)          | 0.98 (0.93, 1.02)         | 0.97 (0.95, 1.00)            | 0.97 (0.93, 1.01)          | 0.97 (0.94, 1.00)         |
| 90th-3D             | 0.94 (0.88, 0.99)            | 0.97 (0.89, 1.06)          | 0.90 (0.83, 0.97)         | 0.93 (0.88, 0.99)            | 0.93 (0.85, 1.01)          | 0.92 (0.86, 1.00)         |
| 90th-2D             | 0.95 (0.89, 1.00)            | 0.95 (0.87, 1.03)          | 0.93 (0.87, 1.00)         | 0.98 (0.92, 1.05)            | 0.97 (0.88, 1.06)          | 0.99 (0.91, 1.07)         |
| 95th-days           | 0.98 (0.94, 1.01)            | 0.99 (0.94, 1.03)          | 0.96 (0.92, 1.01)         | 0.99 (0.95, 1.03)            | 1.00 (0.94, 1.06)          | 0.98 (0.94, 1.03)         |
| 95th-2D             | 0.93 (0.86, 1.00)            | 0.97 (0.88, 1.08)          | 0.89 (0.81, 0.97)         | 0.97 (0.90, 1.04)            | 1.03 (0.93, 1.15)          | 0.90 (0.82, 1.00)         |
| 2 w before delivery | N=4,965                      | N=1,983                    | N=2,982                   | N=4,965                      | N=1,983                    | N=2,982                   |
| Fifth-days          | 1.03 (1.01, 1.05)            | 1.02 (0.99, 1.04)          | 1.04 (1.02, 1.07)         | 1.03 (1.01, 1.05)            | 1.02 (0.99, 1.05)          | 1.04 (1.02, 1.07)         |
| Fifth-2D            | 1.06 (1.03, 1.10)            | 1.03 (0.97, 1.09)          | 1.09 (1.05, 1.14)         | 1.06 (1.02, 1.11)            | 1.02 (0.95, 1.1)           | 1.1 (1.04, 1.16)          |
| 10th-days           | 1.02 (1.01, 1.04)            | 1.01 (0.99, 1.03)          | 1.04 (1.02, 1.06)         | 1.02 (1.01, 1.03)            | 1.01 (0.99, 1.04)          | 1.03 (1.01, 1.05)         |
| 10th-3D             | 1.08 (1.03, 1.13)            | 1.03 (0.95, 1.11)          | 1.12 (1.06, 1.19)         | 1.06 (1.01, 1.11)            | 1.04 (0.96, 1.12)          | 1.09 (1.02, 1.16)         |
| 10th-2D             | 1.05 (1.02, 1.08)            | 1.02 (0.97, 1.07)          | 1.08 (1.04, 1.12)         | 1.04 (1.01, 1.07)            | 1.03 (0.99, 1.08)          | 1.05 (1.01, 1.09)         |
| 90th-days           | 0.99 (0.97, 1.00)            | 0.98 (0.96, 1.00)          | 0.99 (0.97, 1.00)         | 0.99 (0.98, 1.01)            | 0.98 (0.96, 1.01)          | 1.00 (0.98, 1.02)         |
| 90th-3D             | 0.96 (0.92, 1.01)            | 0.94 (0.88, 1.02)          | 0.96 (0.90, 1.02)         | 1.02 (0.96, 1.08)            | 1.01 (0.93, 1.11)          | 1.02 (0.94, 1.10)         |
| 90th-2D             | 0.97 (0.95, 1.00)            | 0.97 (0.92, 1.01)          | 0.97 (0.94, 1.01)         | 1.00 (0.96, 1.03)            | 0.98 (0.93, 1.03)          | 1.00 (0.96, 1.05)         |
| 95th-days           | 0.99 (0.97, 1.01)            | 0.99 (0.97, 1.02)          | 0.98 (0.96, 1.01)         | 1.00 (0.98, 1.02)            | 1.00 (0.96, 1.03)          | 1.00 (0.97, 1.03)         |
| 95th-2D             | 0.97 (0.93, 1.01)            | 0.98 (0.93, 1.04)          | 0.96 (0.91, 1.01)         | 1.01 (0.96, 1.06)            | 0.99 (0.91, 1.07)          | 1.01 (0.95, 1.08)         |

Notes: Generalized linear mixed model was used to examine the associations. Model 1: the extreme climate events were defined by the extreme value and duration of the apparent temperature; Model 2: the extreme climate events were defined by the extreme value and duration of the daily maximum temperature and minimum temperature. All model was adjusted for maternal age, maternal ethnicity, maternal education, insurance type, child sex, parity, GDP per capita, geographic region, conception season, conception year, PM<sub>2.5</sub>, and O<sub>3</sub>.

**Table S11. Associations of extreme climate events with subtypes of preterm birth during 3 and 4 weeks before delivery in the China Labor and Delivery Survey.**

| Extreme events     | Overall PTB       | Early PTB         | Late PTB          |
|--------------------|-------------------|-------------------|-------------------|
|                    | [OR (95% CI)]     | [OR (95% CI)]     | [OR (95% CI)]     |
| 3w before delivery | N=4,965           | N=1,983           | N=2,982           |
| Fifth-days         | 1.02 (1.01, 1.03) | 1.02 (1.00, 1.04) | 1.03 (1.01, 1.04) |
| Fifth-2D           | 1.04 (1.01, 1.07) | 1.03 (0.98, 1.08) | 1.06 (1.02, 1.10) |
| 10th-days          | 1.02 (1.01, 1.03) | 1.01 (1.00, 1.03) | 1.02 (1.01, 1.04) |
| 10th-3D            | 1.05 (1.02, 1.09) | 1.03 (0.98, 1.09) | 1.07 (1.03, 1.12) |
| 10th-2D            | 1.03 (1.01, 1.05) | 1.02 (0.99, 1.06) | 1.05 (1.02, 1.08) |
| 90th-days          | 0.99 (0.98, 1.01) | 0.99 (0.97, 1.00) | 1.00 (0.98, 1.01) |
| 90th-3D            | 0.99 (0.96, 1.03) | 0.97 (0.92, 1.03) | 1.00 (0.96, 1.05) |
| 90th-2D            | 0.99 (0.97, 1.01) | 0.98 (0.95, 1.02) | 0.99 (0.96, 1.02) |
| 95th-days          | 1.00 (0.98, 1.01) | 0.99 (0.97, 1.01) | 1.00 (0.98, 1.02) |
| 95th-2D            | 0.99 (0.95, 1.02) | 0.99 (0.93, 1.04) | 0.98 (0.94, 1.03) |
| 4w before delivery | N=4,965           | N=1,983           | N=2,982           |
| Fifth-days         | 1.02 (1.01, 1.03) | 1.01 (1.00, 1.03) | 1.02 (1.01, 1.03) |
| Fifth-2D           | 1.03 (1.01, 1.05) | 1.02 (0.98, 1.06) | 1.04 (1.02, 1.07) |
| 10th-days          | 1.01 (1.01, 1.02) | 1.01 (1.00, 1.03) | 1.02 (1.01, 1.03) |
| 10th-3D            | 1.04 (1.01, 1.06) | 1.02 (0.98, 1.07) | 1.05 (1.02, 1.09) |
| 10th-2D            | 1.03 (1.01, 1.04) | 1.02 (0.99, 1.05) | 1.03 (1.01, 1.06) |
| 90th-days          | 1.00 (0.99, 1.01) | 0.99 (0.98, 1.01) | 1.00 (0.99, 1.01) |
| 90th-3D            | 1.00 (0.98, 1.03) | 0.99 (0.95, 1.03) | 1.01 (0.98, 1.05) |
| 90th-2D            | 1.00 (0.98, 1.02) | 0.99 (0.96, 1.02) | 1.00 (0.98, 1.02) |
| 95th-days          | 1.00 (0.99, 1.01) | 0.99 (0.98, 1.01) | 1.00 (0.99, 1.02) |
| 95th-2D            | 1.00 (0.97, 1.03) | 0.99 (0.95, 1.04) | 1.00 (0.96, 1.04) |

Notes: Generalized linear mixed model was used to examine the associations. All model was adjusted for maternal age, maternal ethnicity, maternal education, insurance type, child sex, parity, GDP per capita, geographic region, conception season, conception year, PM<sub>2.5</sub>, and O<sub>3</sub>. PTB: preterm birth.

**Table S12. Associations of extreme temperature with preterm birth risks during cold and warm seasons in the China Labor and Delivery Survey.**

| Extreme events     | Overall PTB<br>[OR (95% CI)] | Early PTB<br>[OR (95% CI)] | Late PTB<br>[OR (95% CI)] |
|--------------------|------------------------------|----------------------------|---------------------------|
| 1w before delivery |                              |                            |                           |
| Cold season        | N=2,430                      | N=946                      | N=1,484                   |
| Fifth-days         | 1.05 (1.02, 1.08)            | 1.04 (1.00, 1.09)          | 1.05 (1.01, 1.09)         |
| Fifth-2D           | 1.12 (0.99, 1.26)            | 1.08 (0.89, 1.31)          | 1.15 (0.99, 1.34)         |
| 10th-days          | 1.04 (1.02, 1.07)            | 1.04 (1.00, 1.08)          | 1.04 (1.01, 1.07)         |
| 10th-3D            | 1.06 (1.00, 1.13)            | 1.05 (0.96, 1.16)          | 1.08 (1.00, 1.16)         |
| 10th-2D            | 1.09 (1.03, 1.15)            | 1.09 (1.00, 1.18)          | 1.10 (1.03, 1.17)         |
| Warm season        | N=2,535                      | N=1,037                    | N=1,498                   |
| 90th-days          | 1.02 (1.00, 1.05)            | 1.02 (0.99, 1.06)          | 1.02 (0.99, 1.05)         |
| 90th-3D            | 1.01 (0.96, 1.07)            | 1.04 (0.95, 1.13)          | 0.99 (0.92, 1.06)         |
| 90th-2D            | 1.05 (1.00, 1.11)            | 1.06 (0.97, 1.15)          | 1.04 (0.97, 1.11)         |
| 95th-days          | 1.02 (0.98, 1.05)            | 1.01 (0.96, 1.06)          | 1.01 (0.97, 1.06)         |
| 95th-2D            | 1.07 (0.91, 1.26)            | 1.12 (0.88, 1.42)          | 1.02 (0.83, 1.25)         |
| 2w before delivery |                              |                            |                           |
| Cold season        | N=2,430                      | N=946                      | N=1,484                   |
| Fifth-days         | 1.02 (1.01, 1.04)            | 1.02 (0.99, 1.05)          | 1.03 (1.01, 1.05)         |
| Fifth-2D           | 1.05 (1.01, 1.09)            | 1.04 (0.98, 1.10)          | 1.06 (1.02, 1.11)         |
| 10th-days          | 1.02 (1.01, 1.03)            | 1.02 (1.00, 1.04)          | 1.02 (1.00, 1.04)         |
| 10th-3D            | 1.06 (1.02, 1.11)            | 1.04 (0.97, 1.12)          | 1.08 (1.02, 1.15)         |
| 10th-2D            | 1.04 (1.01, 1.07)            | 1.04 (0.99, 1.09)          | 1.05 (1.01, 1.09)         |
| Warm season        | N=2,535                      | N=1,037                    | N=1,498                   |
| 90th-days          | 1.02 (1.00, 1.03)            | 1.02 (1.00, 1.04)          | 1.02 (1.00, 1.03)         |
| 90th-3D            | 1.05 (1.00, 1.11)            | 1.04 (0.96, 1.12)          | 1.06 (0.99, 1.12)         |
| 90th-2D            | 1.03 (1.00, 1.07)            | 1.03 (0.98, 1.08)          | 1.03 (0.99, 1.07)         |
| 95th-days          | 1.02 (1.00, 1.05)            | 1.03 (0.99, 1.06)          | 1.02 (0.99, 1.05)         |
| 95th-2D            | 1.04 (0.99, 1.09)            | 1.06 (0.99, 1.14)          | 1.02 (0.96, 1.08)         |

Notes: Generalized linear mixed model was used to examine the associations. All model was adjusted for maternal age, maternal ethnicity, maternal education, insurance type, child sex, parity, GDP per capita, geographic region, conception season, conception year, PM<sub>2.5</sub>, and O<sub>3</sub>. PTB: preterm birth.

**Table S13. Associations of extreme climate events with preterm birth among subjects without history of preterm birth in the China Labor and Delivery Survey, stratified by early and late preterm birth (N=69,970).**

| Extreme events     | Overall PTB<br>[OR (95% CI)] | Early PTB<br>[OR (95% CI)] | Late PTB<br>[OR (95% CI)] |
|--------------------|------------------------------|----------------------------|---------------------------|
| 1w before delivery | N=4,771                      | N=1,894                    | N=2,877                   |
| Fifth-days         | 1.07 (1.04, 1.10)            | 1.06 (1.01, 1.11)          | 1.08 (1.04, 1.12)         |
| Fifth-2D           | 1.18 (1.04, 1.34)            | 1.13 (0.93, 1.39)          | 1.23 (1.05, 1.44)         |
| 10th-days          | 1.06 (1.04, 1.09)            | 1.05 (1.01, 1.09)          | 1.08 (1.04, 1.11)         |
| 10th-3D            | 1.10 (1.03, 1.16)            | 1.05 (0.95, 1.16)          | 1.13 (1.05, 1.22)         |
| 10th-2D            | 1.12 (1.06, 1.19)            | 1.08 (0.99, 1.19)          | 1.16 (1.08, 1.25)         |
| 90th-days          | 0.96 (0.93, 0.98)            | 0.95 (0.91, 0.99)          | 0.96 (0.93, 0.99)         |
| 90th-3D            | 0.91 (0.86, 0.96)            | 0.92 (0.84, 1.00)          | 0.89 (0.83, 0.97)         |
| 90th-2D            | 0.96 (0.90, 1.02)            | 0.96 (0.88, 1.05)          | 0.95 (0.88, 1.02)         |
| 95th-days          | 0.97 (0.94, 1.01)            | 0.97 (0.93, 1.02)          | 0.97 (0.93, 1.02)         |
| 95th-2D            | 1.09 (1.02, 1.16)            | 1.08 (0.98, 1.19)          | 1.10 (1.01, 1.19)         |
| 2w before delivery | N=4,771                      | N=1,894                    | N=2,877                   |
| Fifth-days         | 1.03 (1.02, 1.05)            | 1.03 (1.00, 1.05)          | 1.04 (1.02, 1.06)         |
| Fifth-2D           | 1.07 (1.03, 1.11)            | 1.05 (0.99, 1.11)          | 1.09 (1.04, 1.14)         |
| 10th-days          | 1.03 (1.02, 1.04)            | 1.02 (1.00, 1.05)          | 1.04 (1.02, 1.06)         |
| 10th-3D            | 1.09 (1.04, 1.15)            | 1.05 (0.97, 1.13)          | 1.13 (1.06, 1.20)         |
| 10th-2D            | 1.06 (1.03, 1.09)            | 1.04 (0.99, 1.09)          | 1.08 (1.04, 1.12)         |
| 90th-days          | 0.99 (0.97, 1.00)            | 0.98 (0.95, 1.00)          | 0.99 (0.97, 1.01)         |
| 90th-3D            | 0.97 (0.93, 1.03)            | 0.96 (0.89, 1.04)          | 0.98 (0.92, 1.05)         |
| 90th-2D            | 0.98 (0.95, 1.01)            | 0.97 (0.92, 1.01)          | 0.98 (0.94, 1.02)         |
| 95th-days          | 0.99 (0.97, 1.01)            | 0.99 (0.96, 1.02)          | 0.99 (0.96, 1.02)         |
| 95th-2D            | 0.98 (0.93, 1.03)            | 1.00 (0.93, 1.07)          | 0.96 (0.90, 1.02)         |

Notes: Generalized linear mixed model was used to examine the associations. PTB: preterm birth. Early PTB: gestational week 24-34 weeks and late PTBs: 35-36 weeks. Subjects who reported any of PTB history were excluded. All model was adjusted for maternal age, maternal ethnicity, maternal education, insurance type, child sex, parity, GDP per capita, geographic region, conception season, conception year, PM<sub>2.5</sub>, and O<sub>3</sub>.

**Table S14. Associations of extreme climate events with preterm birth among subjects without severe maternal disease in the China Labor and Delivery Survey, stratified by early and late preterm birth (N=69,883).**

| Extreme events     | Overall PTB       | Early PTB         | Late PTB          |
|--------------------|-------------------|-------------------|-------------------|
|                    | [OR (95% CI)]     | [OR (95% CI)]     | [OR (95% CI)]     |
| 1w before delivery | N=4,931           | N=1,972           | N=2,959           |
| Fifth-days         | 1.07 (1.03, 1.10) | 1.05 (1.00, 1.10) | 1.08 (1.04, 1.13) |
| Fifth-2D           | 1.17 (1.04, 1.33) | 1.08 (0.89, 1.32) | 1.26 (1.07, 1.47) |
| 10th-days          | 1.06 (1.03, 1.09) | 1.04 (1.00, 1.08) | 1.08 (1.05, 1.12) |
| 10th-3D            | 1.09 (1.03, 1.16) | 1.03 (0.94, 1.14) | 1.14 (1.06, 1.23) |
| 10th-2D            | 1.12 (1.06, 1.18) | 1.06 (0.97, 1.16) | 1.17 (1.09, 1.26) |
| 90th-days          | 0.97 (0.94, 0.99) | 0.96 (0.93, 1.00) | 0.96 (0.93, 1.00) |
| 90th-3D            | 0.92 (0.87, 0.98) | 0.95 (0.87, 1.03) | 0.90 (0.83, 0.97) |
| 90th-2D            | 0.97 (0.92, 1.03) | 0.99 (0.91, 1.08) | 0.95 (0.88, 1.03) |
| 95th-days          | 0.98 (0.95, 1.02) | 0.99 (0.94, 1.04) | 0.98 (0.93, 1.02) |
| 95th-2D            | 1.08 (1.02, 1.15) | 1.07 (0.97, 1.17) | 1.10 (1.02, 1.19) |
| 2w before delivery | N=4,931           | N=1,972           | N=2,959           |
| Fifth-days         | 1.03 (1.01, 1.05) | 1.02 (0.99, 1.05) | 1.04 (1.02, 1.07) |
| Fifth-2D           | 1.07 (1.03, 1.11) | 1.04 (0.98, 1.10) | 1.10 (1.05, 1.15) |
| 10th-days          | 1.03 (1.01, 1.04) | 1.02 (0.99, 1.04) | 1.04 (1.02, 1.06) |
| 10th-3D            | 1.08 (1.03, 1.14) | 1.03 (0.95, 1.11) | 1.14 (1.07, 1.21) |
| 10th-2D            | 1.05 (1.02, 1.08) | 1.02 (0.97, 1.07) | 1.08 (1.04, 1.12) |
| 90th-days          | 0.99 (0.98, 1.01) | 0.98 (0.96, 1.01) | 0.99 (0.97, 1.01) |
| 90th-3D            | 0.99 (0.94, 1.04) | 0.97 (0.89, 1.05) | 0.99 (0.93, 1.06) |
| 90th-2D            | 0.99 (0.95, 1.02) | 0.98 (0.93, 1.03) | 0.99 (0.95, 1.03) |
| 95th-days          | 1.00 (0.98, 1.02) | 1.00 (0.97, 1.03) | 0.99 (0.97, 1.02) |
| 95th-2D            | 0.99 (0.94, 1.03) | 1.01 (0.94, 1.08) | 0.97 (0.91, 1.03) |

Notes: Generalized linear mixed model was used to examine the associations. Early PTB: gestational week 24-34 weeks and late PTBs: 35-36 weeks. Subjects with the severe maternal disease, including either of diabetes, hypertensive disorders, nephropathy, and toxemia, were excluded. All model was adjusted for maternal age, maternal ethnicity, maternal education, insurance type, child sex, parity, GDP per capita, geographic region, conception season, conception year, PM<sub>2.5</sub>, and O<sub>3</sub>. PTB: preterm birth.

**Table S15. Associations of extreme climate events with preterm birth in the China Labor and Delivery Survey, additionally adjusting for background temperature exposure (N=70,818).**

| Extreme climate events | Overall PTB<br>[OR (95% CI)] | Early PTB<br>[OR (95% CI)] | Late PTB<br>[OR (95% CI)] | Spontaneous PTB<br>[OR (95% CI)] | PPROM<br>[OR (95% CI)] | Iatrogenic PTB<br>[OR (95% CI)] |
|------------------------|------------------------------|----------------------------|---------------------------|----------------------------------|------------------------|---------------------------------|
| 1w before delivery     | N=4,965                      | N=1,983                    | N=2,982                   | N=2,454                          | N=1,358                | N=1,153                         |
| Fifth-days             | 1.07 (1.04, 1.10)            | 1.05 (1.00, 1.10)          | 1.09 (1.05, 1.13)         | 1.07 (1.03, 1.12)                | 1.10 (1.04, 1.16)      | 1.02 (0.95, 1.08)               |
| Fifth-2D               | 1.18 (1.05, 1.34)            | 1.10 (0.90, 1.34)          | 1.26 (1.08, 1.47)         | 1.14 (0.95, 1.35)                | 1.40 (1.12, 1.75)      | 1.04 (0.80, 1.37)               |
| 10th-days              | 1.06 (1.04, 1.09)            | 1.04 (1.00, 1.08)          | 1.08 (1.05, 1.12)         | 1.07 (1.03, 1.10)                | 1.10 (1.05, 1.15)      | 1.02 (0.96, 1.07)               |
| 10th-3D                | 1.09 (1.03, 1.16)            | 1.04 (0.94, 1.14)          | 1.13 (1.05, 1.22)         | 1.15 (1.06, 1.24)                | 1.10 (0.98, 1.23)      | 0.94 (0.82, 1.08)               |
| 10th-2D                | 1.12 (1.06, 1.19)            | 1.07 (0.98, 1.16)          | 1.17 (1.09, 1.26)         | 1.13 (1.05, 1.22)                | 1.16 (1.05, 1.29)      | 1.05 (0.94, 1.19)               |
| 90th-days              | 0.97 (0.94, 0.99)            | 0.96 (0.93, 1.00)          | 0.96 (0.93, 0.99)         | 0.99 (0.95, 1.02)                | 0.92 (0.87, 0.96)      | 0.97 (0.92, 1.02)               |
| 90th-3D                | 0.92 (0.87, 0.98)            | 0.95 (0.87, 1.03)          | 0.89 (0.83, 0.96)         | 0.94 (0.86, 1.01)                | 0.86 (0.77, 0.96)      | 0.95 (0.85, 1.07)               |
| 90th-2D                | 0.97 (0.92, 1.03)            | 0.99 (0.91, 1.08)          | 0.95 (0.88, 1.02)         | 1.00 (0.92, 1.08)                | 0.90 (0.81, 1.01)      | 0.99 (0.88, 1.11)               |
| 95th-days              | 0.98 (0.95, 1.02)            | 0.99 (0.94, 1.04)          | 0.97 (0.93, 1.02)         | 0.99 (0.95, 1.04)                | 0.97 (0.91, 1.03)      | 0.97 (0.90, 1.04)               |
| 95th-2D                | 1.08 (1.02, 1.15)            | 1.08 (0.98, 1.18)          | 1.09 (1.01, 1.18)         | 1.16 (1.06, 1.26)                | 1.07 (0.95, 1.20)      | 0.95 (0.83, 1.08)               |
| 2w before delivery     | N=4,965                      | N=1,983                    | N=2,982                   | N=2,454                          | N=1,358                | N=1,153                         |
| Fifth-days             | 1.03 (1.01, 1.05)            | 1.02 (0.99, 1.05)          | 1.04 (1.02, 1.07)         | 1.04 (1.01, 1.06)                | 1.05 (1.02, 1.08)      | 1.00 (0.97, 1.04)               |
| Fifth-2D               | 1.07 (1.03, 1.11)            | 1.04 (0.98, 1.10)          | 1.10 (1.05, 1.15)         | 1.08 (1.02, 1.13)                | 1.09 (1.02, 1.17)      | 1.02 (0.94, 1.11)               |
| 10th-days              | 1.03 (1.01, 1.04)            | 1.02 (0.99, 1.04)          | 1.04 (1.02, 1.06)         | 1.03 (1.01, 1.05)                | 1.05 (1.02, 1.08)      | 1.00 (0.97, 1.03)               |
| 10th-3D                | 1.08 (1.03, 1.14)            | 1.03 (0.95, 1.11)          | 1.13 (1.07, 1.20)         | 1.09 (1.02, 1.16)                | 1.17 (1.07, 1.28)      | 0.99 (0.89, 1.10)               |
| 10th-2D                | 1.05 (1.02, 1.09)            | 1.03 (0.98, 1.08)          | 1.08 (1.04, 1.12)         | 1.06 (1.02, 1.10)                | 1.09 (1.03, 1.15)      | 1.01 (0.95, 1.08)               |
| 90th-days              | 0.99 (0.97, 1.01)            | 0.98 (0.96, 1.01)          | 0.99 (0.97, 1.01)         | 1.00 (0.98, 1.02)                | 0.96 (0.93, 0.98)      | 1.00 (0.96, 1.03)               |
| 90th-3D                | 0.98 (0.94, 1.04)            | 0.97 (0.90, 1.05)          | 0.99 (0.92, 1.05)         | 1.02 (0.95, 1.09)                | 0.88 (0.80, 0.98)      | 1.02 (0.92, 1.13)               |
| 90th-2D                | 0.98 (0.95, 1.02)            | 0.98 (0.93, 1.03)          | 0.98 (0.94, 1.02)         | 1.00 (0.96, 1.05)                | 0.93 (0.87, 0.99)      | 0.99 (0.93, 1.06)               |
| 95th-days              | 1.00 (0.97, 1.02)            | 1.00 (0.97, 1.03)          | 0.99 (0.96, 1.02)         | 1.01 (0.98, 1.04)                | 0.97 (0.93, 1.01)      | 0.99 (0.95, 1.03)               |
| 95th-2D                | 0.99 (0.94, 1.03)            | 1.01 (0.94, 1.08)          | 0.96 (0.90, 1.02)         | 1.02 (0.96, 1.09)                | 0.94 (0.86, 1.03)      | 0.95 (0.87, 1.05)               |

Notes: Generalized linear mixed model was used to examine the associations. Background temperature was calculated from the averaged ambient temperature during each exposure window. PTB: preterm birth. PPROM: preterm premature rupture of the fetal membranes. All model was adjusted for maternal age, maternal ethnicity, maternal education, insurance type, child sex, parity, GDP per capita, geographic region, conception season, conception year, PM<sub>2.5</sub>, O<sub>3</sub>, and background temperature of each studied period.

**Table S16. Associations of extreme climate events with preterm birth based on data with multiple imputation in the China Labor and Delivery Survey (N=70,818).**

| Extreme climate events | Overall PTB<br>[OR (95% CI)] | Early PTB<br>[OR (95% CI)] | Late PTB<br>[OR (95% CI)] |
|------------------------|------------------------------|----------------------------|---------------------------|
| 1w before delivery     | N=4,965                      | N=1,983                    | N=2,982                   |
| Fifth-days             | 1.06 (1.03, 1.10)            | 1.04 (1.00, 1.10)          | 1.08 (1.04, 1.13)         |
| Fifth-2D               | 1.17 (1.04, 1.33)            | 1.09 (0.90, 1.33)          | 1.26 (1.08, 1.48)         |
| 10th-days              | 1.06 (1.03, 1.09)            | 1.04 (1.00, 1.08)          | 1.08 (1.05, 1.12)         |
| 10th-3D                | 1.09 (1.02, 1.15)            | 1.03 (0.94, 1.13)          | 1.13 (1.05, 1.22)         |
| 10th-2D                | 1.12 (1.06, 1.18)            | 1.06 (0.98, 1.16)          | 1.17 (1.09, 1.25)         |
| 90th-days              | 0.97 (0.94, 0.99)            | 0.96 (0.92, 1.00)          | 0.96 (0.93, 0.99)         |
| 90th-3D                | 0.92 (0.87, 0.98)            | 0.94 (0.86, 1.02)          | 0.90 (0.83, 0.97)         |
| 90th-2D                | 0.97 (0.91, 1.02)            | 0.98 (0.90, 1.07)          | 0.95 (0.88, 1.03)         |
| 95th-days              | 0.98 (0.95, 1.01)            | 0.98 (0.93, 1.03)          | 0.97 (0.93, 1.02)         |
| 95th-2D                | 1.08 (1.02, 1.15)            | 1.07 (0.97, 1.18)          | 1.09 (1.01, 1.18)         |
| 2w before delivery     | N=4,965                      | N=1,983                    | N=2,982                   |
| Fifth-days             | 1.03 (1.01, 1.05)            | 1.02 (0.99, 1.04)          | 1.04 (1.02, 1.06)         |
| Fifth-2D               | 1.06 (1.02, 1.10)            | 1.03 (0.97, 1.09)          | 1.09 (1.04, 1.14)         |
| 10th-days              | 1.03 (1.01, 1.04)            | 1.01 (0.99, 1.04)          | 1.04 (1.02, 1.06)         |
| 10th-3D                | 1.08 (1.03, 1.13)            | 1.02 (0.95, 1.10)          | 1.13 (1.06, 1.20)         |
| 10th-2D                | 1.05 (1.02, 1.08)            | 1.02 (0.97, 1.07)          | 1.08 (1.04, 1.12)         |
| 90th-days              | 0.99 (0.97, 1.00)            | 0.98 (0.96, 1.01)          | 0.99 (0.97, 1.01)         |
| 90th-3D                | 0.98 (0.93, 1.03)            | 0.96 (0.89, 1.04)          | 0.99 (0.93, 1.06)         |
| 90th-2D                | 0.98 (0.95, 1.01)            | 0.97 (0.92, 1.02)          | 0.98 (0.94, 1.03)         |
| 95th-days              | 0.99 (0.97, 1.01)            | 0.99 (0.96, 1.02)          | 0.99 (0.97, 1.02)         |
| 95th-2D                | 0.98 (0.94, 1.03)            | 1.00 (0.94, 1.07)          | 0.97 (0.91, 1.03)         |

Notes: Generalized linear mixed model was used for each dataset to examine the associations. PTB: preterm birth. All model was adjusted for maternal age, maternal ethnicity, maternal education, insurance type, child sex, parity, GDP per capita, geographic region, conception season, conception year, PM<sub>2.5</sub>, and O<sub>3</sub>.



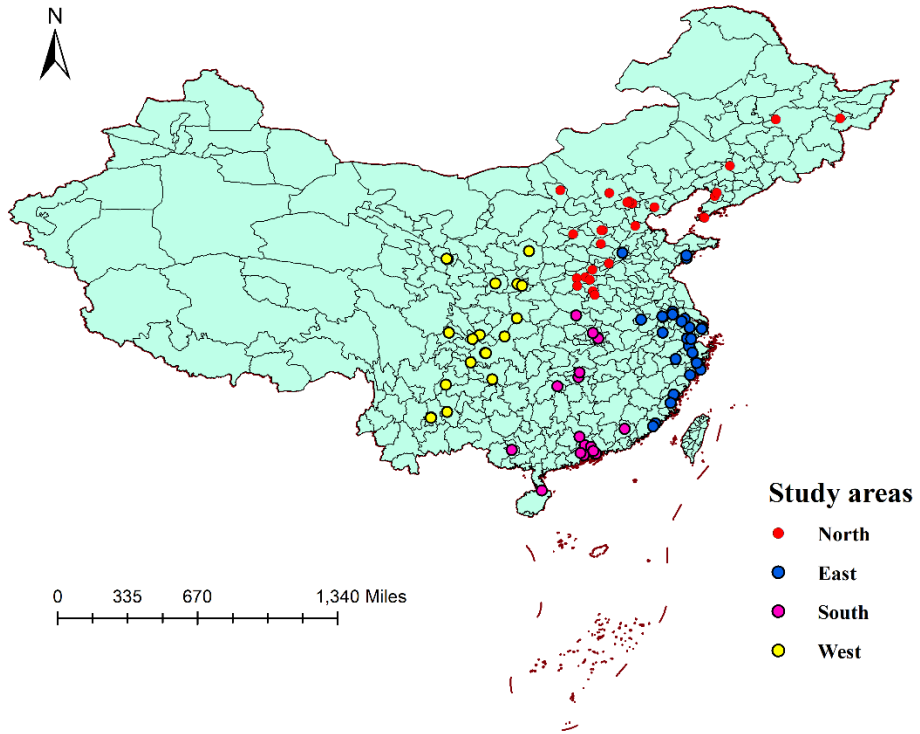

**Fig S1. The geographical location of study areas in China.**

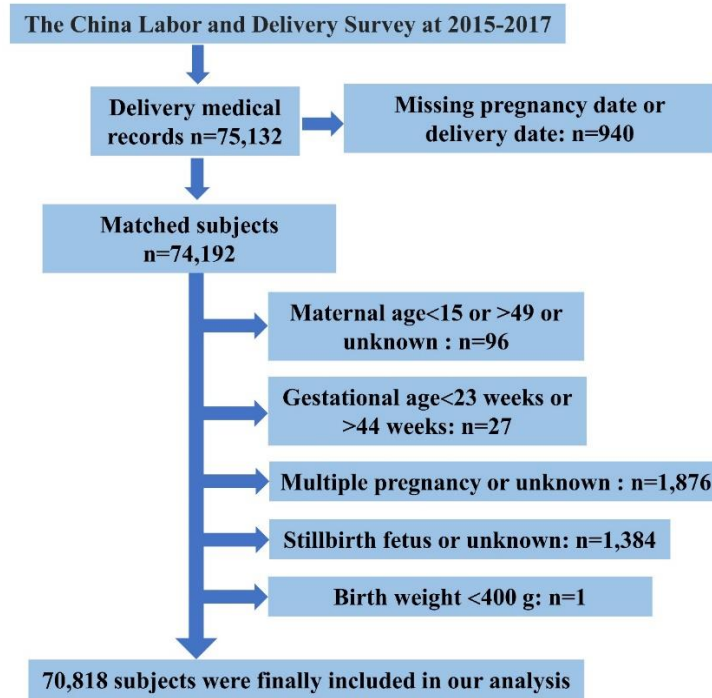

**Fig S2. Flowchart for population selection.**

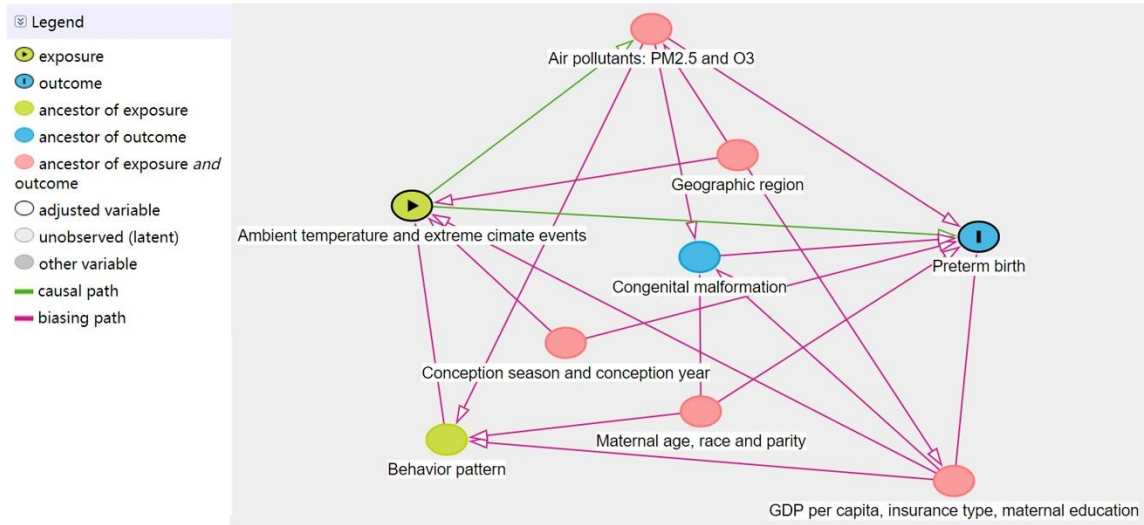

**Fig S3. Directed acyclic graph for covariate selection.**

Notes: We developed the DAG according to published literature and expert knowledge. The nodes and arrows represent variables and the causal associations between them, respectively. The associations among the possible variables, exposure, and outcome derived from the literature (Basu et al. 2016; Bekkar et al. 2020; He et al. 2016; Ilango et al. 2020; Spolter et al. 2020; Sun et al. 2019; Q Wang et al. 2020; YY Wang et al. 2020). DAG was performed in DAGitty, which is available for online use, and package “dagitty” in R software (Textor et al. 2016). Child sex was not shown in DAG due to its unclear role but was considered a covariate in this study as most previous studies did.

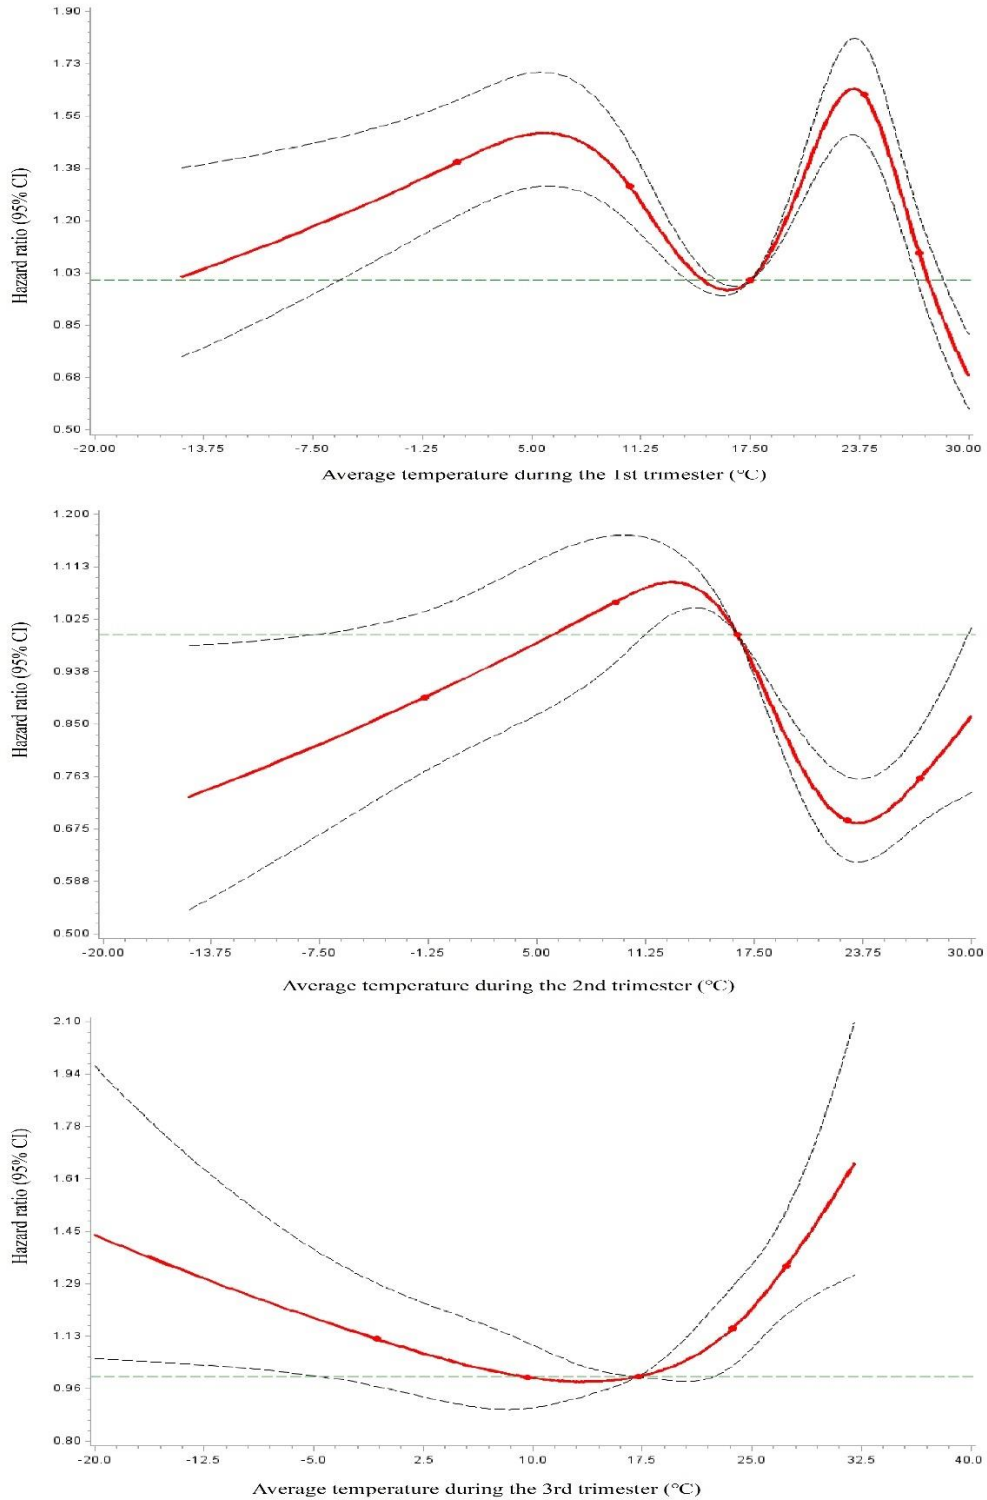

**Fig S4. Relationships between the average temperature exposed during different trimesters and the preterm birth risk in the China Labor and Delivery Survey (N=70,818) (See Tables S9 for corresponding numeric data).**

Notes: Cox proportional hazard regression incorporated with penalized cubic spline was used to examine exposure-response associations. All models were adjusted for maternal age, maternal ethnicity, maternal education, insurance type, child sex, parity, GDP per capita, geographic region, conception season, conception year, PM<sub>2.5</sub>, and O<sub>3</sub>.

## References

- Basu R, Sarovar V, Malig BJ. 2016. Association between high ambient temperature and risk of stillbirth in california. *American journal of epidemiology* 183:894-901.
- Bekkar B, Pacheco S, Basu R, DeNicola N. 2020. Association of air pollution and heat exposure with preterm birth, low birth weight, and stillbirth in the us: A systematic review. *JAMA network open* 3:e208243.
- He JR, Liu Y, Xia XY, Ma WJ, Lin HL, Kan HD, et al. 2016. Ambient temperature and the risk of preterm birth in guangzhou, china (2001-2011). *Environ Health Perspect* 124:1100-1106.
- Ilango SD, Weaver M, Sheridan P, Schwarz L, Clemesha RES, Bruckner T, et al. 2020. Extreme heat episodes and risk of preterm birth in california, 2005-2013. *Environment international* 137:105541.
- Sun S, Weinberger KR, Spangler KR, Eliot MN, Braun JM, Wellenius GA. 2019. Ambient temperature and preterm birth: A retrospective study of 32 million us singleton births. *Environment international* 126:7-13.
- Wang Q, Li B, Benmarhnia T, Hajat S, Ren M, Liu T, et al. 2020. Independent and combined effects of heatwaves and pm2.5 on preterm birth in guangzhou, china: A survival analysis. *Environ Health Perspect* 128:17006.
- Wang YY, Li Q, Guo Y, Zhou H, Wang QM, Shen HP, et al. 2020. Ambient temperature and the risk of preterm birth: A national birth cohort study in the mainland china. *Environment international* 142:105851.
- Textor J, van der Zander B, Gilthorpe MS, Liskiewicz M, Ellison GT. 2016. Robust causal inference using directed acyclic graphs: The r package 'dagitty'. *International journal of epidemiology* 45:1887-1894.
