# Supplementary material
Source: PubMed Central journal article supplement (PMC10431497)
Supplement: ehp10831.smcontents.508.pdf [file ehp10831.smcontents.508.pdf]

**Note to readers with disabilities:** *EHP* strives to ensure that all journal content is accessible to all readers. However, some figures and Supplemental Material published in *EHP* articles may not conform to [508 standards](#) due to the complexity of the information being presented. If you need assistance accessing journal content, please contact [ehp508@niehs.nih.gov](mailto:ehp508@niehs.nih.gov). Our staff will work with you to assess and meet your accessibility needs within 3 working days.

### **Supplemental Material**

#### **Extreme Temperature Exposure and Risks of Preterm Birth Subtypes Based on a Nationwide Survey in China**

Guoqi Yu, Ling Yang, Ming Liu, Cuiping Wang, Xiaoli Shen, Lichun Fan, and Jun Zhang

#### **Table of Contents**

**Table S1.** The selection basis of the China Labor and Delivery Survey to determine the sample size of deliveries in each hospital according to their levels and types.

**Table S2.** Basic characteristics of climate and air pollution by outcomes in the China Labor and Delivery Survey (N=70,818).

**Table S3.** Basic characteristics of temperature exposure by delivery hospitals and geographic regions in the China Labor and Delivery Survey (N=70,818).

**Table S4.** Extreme climate event exposure by time periods and outcomes in the China Labor and Delivery Survey (N=70,818).

**Table S5.** Associations of extreme climate events with early and late preterm birth in the China Labor and Delivery Survey.

**Table S6.** Associations of extreme climate events with early and late preterm birth in the China Labor and Delivery Survey, stratified by clinical subtypes.

**Table S7.** Associations of extreme climate events with preterm birth in the China Labor and Delivery Survey, stratified by geographic regions.

**Table S8.** Associations of extreme climate events with preterm birth in the China Labor and Delivery Survey, stratified by child sex.

**Table S9.** Estimates from the Cox regression investigating associations of temperature exposure with PTB in the China Labor and Delivery Survey (N=70,818).

**Table S10.** Associations of extreme climate events with preterm birth under different temperature definitions in the China Labor and Delivery Survey.

**Table S11.** Associations of extreme climate events with subtypes of preterm birth during 3 and 4 weeks before delivery in the China Labor and Delivery Survey.

**Table S12.** Associations of extreme temperature with preterm birth risks during cold and warm seasons in the China Labor and Delivery Survey.

**Table S13.** Associations of extreme climate events with preterm birth among subjects without history of preterm birth in the China Labor and Delivery Survey, stratified by early and late preterm birth (N=69,970).

**Table S14.** Associations of extreme climate events with preterm birth among subjects without severe maternal disease in the China Labor and Delivery Survey, stratified by early and late preterm birth (N=69,883).

**Table S15.** Associations of extreme climate events with preterm birth in the China Labor and Delivery Survey, additionally adjusting for background temperature exposure (N=70,818).

**Table S16.** Associations of extreme climate events with preterm birth based on data with multiple imputation in the China Labor and Delivery Survey (N=70,818).

**Figure S1.** The geographical location of study areas in China.

**Figure S2.** Flowchart for population selection.

**Figure S3.** Directed acyclic graph for covariate selection.

**Figure S4.** Relationships between the average temperature exposed during different trimesters and the preterm birth risk in the China Labor and Delivery Survey (N=70,818) (See Tables S9 for corresponding numeric data).

## References
